## **Age and genetic background determine hybrid male sterility in house mice**

Samuel J. Widmayer<sup>1</sup> and David L. Aylor<sup>1,2</sup>

<sup>1</sup>Department of Biological Science, W.M. Keck Center for Behavioral Biology, and Graduate Program in Genetics, North Carolina State University, Raleigh, NC 27695

<sup>2</sup>Bioinformatics Research Center, Center for Human Health and the Environment, and Comparative Medicine Institute, North Carolina State University, Raleigh, NC 27695

Correspondence to:

Department of Biological Sciences, North Carolina State University, Campus Box 7614, Raleigh, NC 27695-7614

Email: [dlaylor@ncsu.edu](mailto:dlaylor@ncsu.edu)

1 **Abstract**

2 Hybrid male sterility (HMS) is a unique type of reproductive isolation commonly observed  
3 between house mouse (*Mus musculus*) subspecies in the wild and in laboratory crosses. We  
4 identified hybrids that display three distinct trajectories of fertility despite having identical  
5 genotypes at the major HMS gene *Prdm9* and the X Chromosome. In each case, we crossed  
6 female PWK/PhJ mice representative of the *M.m.musculus* subspecies to males from classical  
7 inbred strains representative of *M.m.domesticus*: 129S1/SvImJ, A/J, C57BL/6J, and DBA/2J.  
8 PWK129S1 males are always sterile, while PWKDBA2 males escape HMS. In addition, we  
9 observe age-dependent sterility in PWKB6 and PWKAJ males. These males are fertile  
10 between 15 and 35 weeks with moderate penetrance. These results point to multiple  
11 segregating HMS modifier alleles, some of which have an age-dependent mode of action. Age-  
12 dependent mechanisms could have broad implications for the maintenance of reproductive  
13 barriers in nature.

14

## 15 **Author Summary**

16 Two subspecies of house mice show partial reproductive barriers in nature, and may be in the  
17 process of speciation. We used mice derived from each subspecies to replicate hybrid male  
18 sterility (HMS) in laboratory mice. Two major genetic factors are well established as playing a  
19 role in mouse HMS, but the number of additional factors and their mechanisms are unknown.  
20 We characterized reproductive trait variation in a set of hybrid male mice that were specifically  
21 designed to eliminate the effects of known genetic factors. We discovered that age played an  
22 important role in fertility of some hybrids. These hybrid males showed a delayed onset of  
23 fertility, then became fertile for only a few weeks. Across all hybrids males in our study, we  
24 observed three distinct trajectories of fertility: complete fertility, complete sterility, and age-  
25 dependent fertility. These results point to two or more critical HMS variants with large enough  
26 effects to completely restore fertility. This study advances our understanding of the genetic  
27 architecture and biological mechanisms of reproductive isolation in mice.  
28

## 29 Introduction

30 Hybrid male sterility (HMS) is a special type of reproductive isolation wherein crosses  
31 between genetically distinct groups produce viable, yet sterile male offspring. The  
32 Dobzhansky-Muller model of reproductive isolation [1-3] proposes an evolutionary genetic  
33 mechanism for the development of reproductive incompatibilities. With enough restriction to  
34 gene flow, diverging populations accumulate and fix new mutations. While these unique alleles  
35 are neutral within each population, these alleles act deleteriously in hybrids through epistatic  
36 interactions that cause HMS.

37 House mice (*Mus musculus*) are a powerful system for studying HMS. House mice have  
38 a cosmopolitan distribution and exist in three genetically distinct subspecies: *M. m. musculus*,  
39 *domesticus*, and *castaneus* [4-6]. These subspecies began diverging approximately 500  
40 thousand years ago [7], yet gene flow between the subspecies is still substantial. A narrow  
41 hybrid zone exists between the *musculus* and *domesticus* subspecies, which have natural  
42 distributions across eastern and western Europe, respectively. These two subspecies are in  
43 the earliest stages of reproductive isolation. Allele frequencies exhibit sharp clines across the  
44 hybrid zone [8-10], and reduced fertility is common in mice with relatively high degrees of  
45 subspecies admixture [11]. These findings provide strong support for the reduction of gene  
46 flow between subspecies due to partial reproductive isolation in wild mice.

47 Studies of natural mouse populations have revealed few candidate HMS loci, and  
48 others have made progress by crossing inbred mouse strains representative of the major  
49 mouse subspecies [12]. The majority of classical inbred mouse strains are genetic mosaics  
50 of the subspecies but the vast majority of the genome consists of *domesticus* ancestry [13].  
51 Hybrid sterility is generally asymmetric in crosses between primarily *domesticus*- and  
52 *musculus*-derived inbred strains, affecting only hybrid males derived from *musculus* dams and  
53 *domesticus* sires [14-17]. Only one gene and one QTL have been definitively linked to the  
54 development of HMS. *Prdm9* is a histone methyltransferase that is necessary for the formation  
55 of the synaptonemal complex [15-20]. *Hstx2* [21-23] is a QTL on Chr X<sup>Msc</sup> that is necessary for  
56 HMS in all reported *musculus* x *domesticus* hybrids. Specific genotypes at these loci lead to  
57 asynapsis during pachytene [15, 16, 18] and to impaired meiotic sex chromosome  
58 inactivation (MSCI) [17, 21, 24-26] and subsequently to HMS.

59 Allelic variation at *Prdm9* has been shown to play a key role in most studies of mouse  
60 HMS [15]. In fertile mice, *Prdm9* binds DNA and demarcates recombination hotspots by  
61 directing double-stranded break (DSB) initiation sites immediately preceding the synapsis of  
62 homologous chromosomes [27, 28] during spermatogenesis. The *Prdm9*<sup>Dom2</sup> allele exhibits  
63 DNA-binding motif variation relative to *Prdm9*<sup>Msc</sup> or *Prdm9*<sup>Dom3</sup>, and the protein isoforms exhibit  
64 allele-specific binding genome-wide [29-32]. Aberrant DNA-binding in *Prdm9* heterozygotes  
65 results in asynapsis [15, 16, 19, 27, 29, 33]. Fertility in this system can be rescued by  
66 decreasing the degree of asymmetric *Prdm9*-binding through transgenic rescue [16], replacing  
67 the *Dom2* allele with *Dom3* or humanized *Prdm9* alleles) [16, 18, 19], or by artificially creating  
68 symmetric homologs [34]. One model of HMS in mice posits that the exact locations of the  
69 asymmetric hotspots matter less than their abundance or density. In this model, *Prdm9* is the  
70 only essential HMS gene. Diffuse genetic background effects are not dependent on specific  
71 HMS alleles, since almost any stretch of asymmetric double-strand break repair could be the  
72 cause of asynapsis. The key prediction of this model is that the proportion of *domesticus*

73 ancestry should predict the degree of aberrant *Prdm9* binding and subsequently the degree of  
74 asynapsis.

75 Although *Prdm9* and *Hstx2* are important drivers of HMS, they are not sufficient to do so  
76 on all genetic backgrounds. Wild mice captured from the hybrid zone are frequently fertile,  
77 indicating that specific genetic architectures rescue fertility [11, 35]. Moreover, male progeny of  
78 C57BL/6J-Chr 17<sup>PWD</sup> consomic sire and C57BL/6J-Chr X<sup>PWD</sup> consomic dam carry the known  
79 HMS genotypes and are fertile, indicating the existence of additional alleles that can rescue  
80 fertility in the B6 background [22]. *Prdm9* has at least two segregating alleles within the  
81 *domesticus* subspecies. Intersubspecific hybrid male mice that carry *Prdm9*<sup>Dom2</sup> (e.g.  
82 C57BL/6J) are generally sterile, while hybrid male mice that carry *Prdm9*<sup>Dom3</sup> (e.g, WSB/EiJ)  
83 are typically fertile. However, reproductive phenotypes segregated in F2 intercrosses derived  
84 from WSB, and several QTL have been associated independent of *Prdm9* or Chr X [35-37].  
85 Other forward genetics approaches have identified large-effect QTL in the wild [35] and  
86 between *musculus*-derived inbred mouse strains [14, 38]. Thus, while *Prdm9* and *Hstx2*  
87 explain a large proportion of variation in HMS phenotypes, the complete genetic architecture of  
88 HMS is unknown.

89 We found that PWK-derived F1 hybrids displayed three distinct trajectories of HMS that  
90 were dependent on age and genetic background: complete sterility throughout life, complete  
91 fertility throughout life and age-dependent HMS. This finding is significant because these  
92 hybrids all harbored identical genotypes at the two major HMS loci, *Prdm9* and Chr X.  
93 Therefore, HMS is necessarily linked to undiscovered alleles segregating between these  
94 strains. We measured fertility profiles and the cellular phenotypes that were linked to HMS at  
95 three ages for each hybrid. Lastly, we identified regions of subspecific ancestry that are  
96 candidates to harbor HMS alleles. Together, these results provide the first evidence for age-  
97 dependent HMS in the mouse and substantially advance our understanding of genetic  
98 reproductive isolation in mice.

99

## 100 Results

### 101 Genetic background controls HMS phenotypic variation

102 We crossed PWK females to males of four different inbred mouse strains: 129S1, A/J,  
103 B6, and DBA2 (**Figure 1A**) and measured reproductive phenotypes in the resulting focal hybrid  
104 males at 8 weeks of age. Males across this panel had invariant *Prdm9* and Chr X genotypes,  
105 which allowed us to directly test the effects of background genetic variation on HMS traits. We  
106 also generated reciprocal hybrids by crossing 129S1, A/J, B6, and DBA2 females to PWK  
107 males (**Figure 1B**). These mice were similarly invariant at *Prdm9* but lacked the *musculus* Chr  
108 X that previously has been linked to HMS.

109 PWK129S1, PWKAJ, and PWKB6 mice displayed reproductive phenotypes consistent  
110 with sterility (**Figure 2, Table S1**). All three of these hybrid males had reduced combined  
111 testes weights (**Figure 2A**) and total sperm counts (**Figure 2B**) relative to their reciprocal  
112 hybrids ( $p \leq 0.001$ ). These results are important because both PWKAJ and PWKB6 have  
113 previously been reported to be fertile hybrid mice. In fact, fertile PWKAJ and fertile PWKB6  
114 mice were necessary contributors to the two large mouse population-based resources, the  
115 Collaborative Cross (CC) and the Diversity Outbred (DO) population [39, 40]. In contrast,

116 PWK129S1 males were known to be sterile [41]. In addition, PWKDBA2 males displayed  
117 substantially increased reproductive phenotypes relative to the other focal hybrids ( $p \leq 0.001$ ).  
118 PWKDBA2 testes weights were indistinguishable from reciprocal DBA2PWK males ( $p =$   
119  $0.7813$ ) yet had reduced sperm counts ( $p \leq 0.0002$ ) that were intermediate between  
120 reciprocals and the other focal hybrids.

121 These phenotypes suggested meiotic failure consistent with *Prdm9*-driven HMS. To test  
122 this, we analyzed histological cross-sections from the left testis of hybrid male mice, and  
123 estimated the percentage of seminiferous tubules within each cross-section that contained  
124 post-meiotic germ cells (PMCs) as a proxy for successful spermatogenesis (**Figure 2C**). We  
125 found that PWK129S1 (77%), PWKB6 (55%), and PWKAJ (67%) males each had a smaller  
126 fraction PMCs compared to PWKDBA2 males (**Figure 2D–2F**) ( $p_{adj} \leq 0.016$ ) or their reciprocal  
127 hybrids ( $p \leq 0.001$ ). The percent of seminiferous tubules with PMCs for PWKDBA2 and all  
128 reciprocal hybrids was at least 96% (**Figure 2G**) with a median of 100%. These results showed  
129 that sterility in PWK129S1, PWKB6, and PWKAJ males was meiotic or pre-meiotic in  
130 mechanism. However, these PWK-derived hybrids did not display a complete meiotic block as  
131 has been shown in other intersubspecific hybrids [15, 16]. These findings also confirmed that  
132 spermatogenesis in PWKDBA2 hybrids is virtually unaffected.

133 These results clearly showed that one or more genetic variants in the DBA2 strain  
134 rescued fertility even in the presence of *Prdm9*<sup>Dom2</sup> and a PWK Chr X. In addition, these results  
135 introduced a conundrum. In contrast to our expectations, PWKAJ and PWKB6 males were  
136 sterile at 8 weeks of age and mirrored the expected sterility of PWK129S1 hybrids in both  
137 phenotype and cell composition.

138

### 139 | *Fertility is age-dependent in PWKB6 and PWKAJ hybrids*

140 Two separate observations suggested that age might help reconcile our initial results in  
141 PWKB6 hybrid males with their expected fertility. First, a colleague reported anecdotally that  
142 PWKWSB hybrids became prematurely sterile during an independent experiment investigating  
143 paternal age effects, often after successfully siring several litters (James Crowley, personal  
144 communication circa June 2011). We designed a breeding experiment to investigate this  
145 observation and to see if a similar phenomenon applied to PWKB6 males. Second, Forejt and  
146 colleagues reported that PWKB6 hybrid males exhibit delayed onset of fertility [18] during the  
147 course of our initial experiments. Therefore, we subsequently ran a second breeding  
148 experiment to characterize the onset of fertility. We crossed adult PWKWSB males ( $n=55$ ) and  
149 PWKB6 males ( $n=63$ ) that were at least 15 weeks of age to FVB females and continuously  
150 mated them until they ceased producing offspring. WSB harbors a *Prdm9*<sup>Dom3</sup> allele and  
151 PWKWSB hybrids are generally thought to be fertile. Given the importance of the *Prdm9*<sup>Dom2</sup>  
152 allele in PWKB6 HMS, we had no specific expectation of an age effect.

153 Only 40% of PWKB6 males sired offspring and the number of litters decreased with  
154 age. Furthermore, no PWKB6 males sired offspring after 35 weeks of age (**Figure 3**).  
155 PWKWSB males also showed a premature sterility, but at a much more advanced age. Nearly  
156 all PWKWSB males were fertile at 20 weeks of age (94%), but none were fertile after 58 weeks  
157 of age, with fewer than half of males siring litters. We concluded that HMS in PWKB6 hybrid  
158 male mice had a high but incomplete penetrance. In addition, we concluded that PWK-derived  
159 interspecific hybrids that are fertile during early life exhibited sterility past specific age points.

160 Moreover, this age-dependent sterility occurred in both *Prdm9<sup>Dom2</sup>* and *Prdm9<sup>Dom3</sup>* genetic  
161 backgrounds. These results established age as a critical factor in our system, but they did not  
162 explain why PWKB6 mice were sterile at age 8 weeks. If we had expected 60% of PWKB6  
163 males to be sterile, our observation of 100% sterility was unlikely ( $p = 0.0168$  in a  
164 *Binomial*(8,0.6) distribution).

165 To determine the age of fertility onset, we crossed young mice (5-8 weeks) to fertile  
166 females and measured latency until the first successful mating. PWKB6 males ( $n=17$ ) bred  
167 continuously until age 20 weeks, and additional mice ( $n=9$ ) were bred continuously until age 15  
168 weeks. We also included PWKAJ males ( $n=6$ ), reciprocal B6PWK males ( $n=6$ ), and PWKDBA2  
169 males ( $n=3$ ). All PWKDBA2 and four of six B6PWK males sired offspring by 8 weeks of age,  
170 consistent with our initial screen. In contrast, the majority of PWKB6 and PWKAJ hybrid males  
171 were sterile. However, three of 26 PWKB6 males and two of six PWKAJ males sired litters at  
172 ages ranging from 12 to 20 weeks. All litters sired by PWKB6 consisted of only one pup, and  
173 the litters sired by PWKAJ males were of two and three pups. These litter sizes were  
174 substantially reduced compared to those sired by reciprocal B6PWK males (5-11 pups). These  
175 results supported our conclusion that sterility in PWKB6 male mice had a high but incomplete  
176 penetrance, and extended this result to PWKAJ. In addition, those PWKB6 and PWKAJ males  
177 that were fertile experienced a delay in the onset of fertility with respect to reciprocal hybrids,  
178 and showed reduced fertility based on litter sizes.

179 Having established the importance of age, we collected reproductive phenotypes of the  
180 focal hybrid males and their reciprocals at ages 20 weeks and 35 weeks (**Figure 4**).  
181 PWK129S1 males exhibited little change in testes weight or sperm counts, which remained  
182 under one million ( $p \leq 0.99$ ). In addition, PWK129S1 males displayed a reduction in the  
183 percentage of seminiferous tubules with PMCs between 8 and 20 weeks, from a mean of 77%  
184 at age 8 weeks to 52% at 20 weeks ( $p \leq 0.0158$ ). These results were consistent with complete  
185 sterility in PWK129S1 males.

186 In contrast, PWKDBA2 mice exhibited phenotypes consistent with fertility throughout  
187 life. Testes weight showed no change ( $p \leq 0.3533$ ), but sperm count increased by 20 weeks ( $p$   
188  $\leq 0.0019$ ) and then declined somewhat by 35 weeks ( $p \leq 0.0423$ ). Similar patterns were seen  
189 in the reciprocal hybrid males, though PWKDBA2 males never approached the high sperm  
190 counts of their reciprocals ( $p \leq 0.001$ ). The proportion of seminiferous tubules with PMCs  
191 exhibited no significant changes with age and PWKDBA2 males looked similar to reciprocals,  
192 except for a decline to 91% at 35 weeks ( $p \leq 0.139$ ). We concluded that age does not  
193 substantially impact the fertility of PWKDBA2 mice.

194 PWKB6 and PWKAJ mice exhibited marked increases in testes weight, sperm count,  
195 and the proportion of seminiferous tubules containing PMCs at age 20 weeks in comparison to  
196 8 weeks (2-way ANOVA  $p \leq 0.001$ ). The average PWKB6 combined testes weight increased  
197 by 22%, and the average sperm count displayed a 20-fold increase. The average PWKAJ  
198 combined testes weight increased by 12%, and sperm count increased over 60-fold. There  
199 was substantial variation in sperm count relative to 8 weeks in both PWKB6 (561,000 to 4.4  
200 million) and PWKAJ (418,000 to 2 million). The proportion of seminiferous tubules containing  
201 PMCs ranged from 32% to 100%. These high variances were consistent with incomplete  
202 penetrance of HMS in PWKB6 and PWKAJ hybrids. All three fertility traits declined between 20  
203 and 35 weeks of age in both PWKB6 and PWKAJ and were consistent with sterility. 94% of

204 PWKWSB males were fertile throughout the 20-35 weeks window, indicating no effects until  
205 much later in life.

206 These complementary experiments gave us the first clear picture of a complex fertility  
207 curve in PWKB6 and PWKAJ male mice. Most of these hybrid males were sterile. For others,  
208 fertility was transient. The onset of fertility was delayed until age 12 weeks or later. Even after  
209 siring one or more litters, these hybrid males were all sterile by age 8 months. We concluded  
210 that our four focal hybrids PWK129S1, PWKB6, PWKAJ, and PWKDBA2 mice display three  
211 distinct trajectories of fertility: complete sterility (PWK129S1), complete fertility (PWKDBA2),  
212 and age-dependent fertility (PWKB6, PWKAJ). PWKWSB displays a fourth fertility trajectory  
213 that is likely influenced by its distinct *Prdm9*<sup>Dom<sup>3</sup></sup> allele. This novel observation of age-  
214 dependent fertility reconciled our results with the literature and major breeding programs.

215

216 *Genomic patterns of subspecific origin implicate candidate HMS modifiers*

217 The classical inbred strains in this study descend primarily from *M.m.domesticus*  
218 ancestors, but have important contributions from *M.m.musculus*. The surprising fertility of  
219 PWKDBA2 hybrid males could be explained if the DBA2 genome had the greatest similarity to  
220 the PWK genome, compared to the genomes of 129S1, A/J, and B6. We compared each  
221 inbred strain to PWK and isolated areas of the genome where each inbred strain shared  
222 subspecific ancestry using publically available data [42]. We make no assumptions about  
223 whether the mode of action of these incompatibilities were due to underdominance at one  
224 locus, or by acting epistatically in conjunction with at least one additional locus. In addition, we  
225 also considered loci that shared ancestry regardless of subspecies identity, since PWK also  
226 has 5.72% *domesticus* ancestry. DBA2 did not share substantially more identity overall with  
227 PWK than the other three strains. DBA2 and PWK shared subspecific ancestry across 295.7  
228 Mb of the genome (10.83%), similar to the shared ancestry between 129S1(10.30%), B6  
229 (9.85%), and A/J (8.39%).

230 Nonetheless, we reasoned that the specific regions of the genome shared between  
231 PWK and specific classical strains but not others are good candidate locations for HMS  
232 modifier alleles. We focused on four specific contrasts based on the three patterns we  
233 observed in our experiments (**Figure 5, Table S2**). First, we searched for regions of the  
234 genome where only 129S1 differed in subspecific ancestry from PWK, reasoning that these  
235 regions may be enriched for incompatibility alleles unique to the 129S1 genetic background.  
236 We identified nine such regions (7.07 Mb) across six chromosomes. These regions contain  
237 108 genes in total. Second, we searched for regions of the genome where A/J and B6 shared  
238 subspecific ancestry with each other but were different than DBA or 129S1. Regions where  
239 these strains also shared ancestry with PWK may harbor alleles that distinguish the age-  
240 dependent HMS in PWKAJ and PWKB6 males from the always-sterile PWK129S1 male. We  
241 found such seven regions (12.00 Mb) containing 146 genes. Regions in which A/J and B6  
242 were alike but were different than the other three strains might harbor HMS alleles that explain  
243 the age-dependent effects. We found fourteen such regions (21.34 Mb) containing 111 genes.  
244 Finally, we searched for regions of the genome where only DBA2 shared subspecific ancestry  
245 with PWK. We reasoned that these regions might contain the critical modifier allele or alleles  
246 unique to DBA2 that rescue HMS in PWKDBA2 males. We discovered 44 such regions (87.65  
247 Mb) across fifteen chromosomes. These loci contain a total of 834 genes. These candidate



248 regions overlap several previously identified HMS QTL [21, 22, 36, 37] (black bars in **Figure 5**)  
249 and include genes that have been previously implicated in reproductive phenotypes.

250

## 251 | Discussion

252

### 253 *Genetic architecture of HMS*

254 Our results clearly show that HMS alleles segregate within the classical inbred strains,  
255 independent of the known major HMS loci. All the focal hybrids in this study share  
256 *Prdm9<sup>Dom2/Msc</sup>* genotype and carry the PWK Chr X. Chr Y is identical in the four classical inbred  
257 strain in our study. The three fertility trajectories we describe require at least two undiscovered  
258 autosomal factors. This supports a growing body of evidence that specific modifier alleles  
259 segregate in mice that rescue hybrids from male sterility. Several QTL have been associated  
260 previously with HMS phenotypes in both laboratory and wild-caught mice [35-38]. The ability to  
261 identify these modifiers has been hampered in most studies by segregating variation at the two  
262 major HMS loci. Our approach isolated the effects of modifiers that segregate within classical  
263 inbred strains, such that all of the phenotypic differences we see are due to the action of these  
264 modifiers. This advance is important because we have identified the specific strains that harbor  
265 modifier alleles. Furthermore, we have uncovered the importance of age to HMS and  
266 estimated the penetrance of HMS in PWKB6 hybrid males. With this prerequisite knowledge,  
267 our approach can be extended to QTL mapping to isolate and then identify specific modifier  
268 alleles.

269 The reciprocal hybrid males were all fertile, suggesting that the PWK Chr X was  
270 necessary for sterility in the focal hybrid males. However, the PWKWSB male sterility at 18  
271 months shows that the age-dependent phenotypes are not dependent on the *Prdm9<sup>Dom2</sup>* allele,  
272 since WSB carries *Prdm9<sup>Dom3</sup>*. This supports previous findings that hybrids with *Prdm9<sup>Dom3/Msc</sup>*  
273 genotypes are categorically fertile but carry significantly reduced reproductive phenotypes in  
274 comparison to reciprocal hybrids [14, 36]. Furthermore, even the large-effect allele *Prdm9<sup>Dom2</sup>*  
275 is not sufficient for HMS, since the PWKDBA2 hybrid carries that allele and exhibits complete  
276 fertility.

277 The PWKDBA2 result allowed us to reevaluate the hypothesis that mouse HMS is largely  
278 caused by diffuse genetic background differences throughout the genome that interact with  
279 *Prdm9*. If the DBA genome were more similar to PWK than the other classical inbred strains,  
280 which could explain the fertility of PWKDBA2 hybrids. However, our analysis showed that only  
281 a small fraction of the 129S1, A/J, B6, and DBA2 genomes showed *musculus* ancestry, and  
282 this fraction was roughly equal between the strains. We conclude that the dramatic phenotypic  
283 variation we see between these hybrids is most likely due to specific HMS modifier alleles  
284 segregating among those strains.

285

### 286 *Implications of age-dependent HMS*

287 Steep allelic clines [11, 35] and reduced introgression on Chr X [10, 43] provide  
288 evidence that segregating HMS alleles are a partial reproductive barrier in the Central  
289 European mouse hybrid zone. If age-dependent HMS alleles segregate in the wild, they would  
290 allow certain hybrid males to escape infertility during a narrow window of life. Males exhibiting

291 age-dependent HMS could hypothetically transmit HMS alleles to the next generation yet  
292 would have reduced relative fitness. Nonetheless, the window of fertility would attenuate the  
293 fitness cost of HMS and could promote the maintenance of the hybrid zone. Investigating this  
294 scenario will be difficult until we know the specific location of HMS modifiers.

295 Our results have immediate application to the increasingly popular Collaborative Cross  
296 and Diversity Outbred multi-parent mouse reference populations. The CC is a panel of  
297 recombinant inbred lines that are descended from eight inbred mouse strains including PWK,  
298 B6, A/J, and 129S1 [40, 41, 44] (DBA2 was not included), and DO is an outbred population  
299 descended from the same progenitors [45]. The CC breeding design necessarily depended on  
300 the focal hybrids derived from those strains. PWK129S1 hybrids were found to be sterile early  
301 in the breeding program [41] and did not contribute to CC lines. There was no specific  
302 observation of sterility in PWKAJ, PWKB6, or other hybrids offspring of PWK dams. However,  
303 most incipient CC lines (95%) stopped producing offspring during the inbreeding phase of the  
304 breeding program and were declared extinct. Nearly half (47%) of extinct lines contained  
305 sterile males [46], implicating HMS alleles segregating within the lines. Previously, we have  
306 concluded that epistasis involving 129S1 and PWK alleles were major drivers of male sterility  
307 and extinction. QTL mapping associated the PWK from a region on distal Chr X with male  
308 sterility [46]. However, each ancestral allele is only present in roughly an eighth of lines, and  
309 alleles from these two strains cannot explain the extinction rate entirely. HMS alleles harbored  
310 by B6 and A/J were segregating in the CC lines and could have had a substantial impact on  
311 extinction rate. Furthermore, the age-dependent sterility that we have described would have  
312 been difficult to detect, since fertility is incompletely penetrant and transient. According to the  
313 UNC Systems Genetics Core [47] that provides CC mice, fewer than 50% of males produce  
314 litters for nine different CC strains, suggesting that HMS modifier alleles were not eliminated  
315 during the breeding program and are relevant to current CC experiments as well as  
316 experimental crosses derived from CC strains.

317

### 318 *Mechanisms of age-dependent HMS*

319 The molecular and cellular changes that confer fertility during such a narrow age range  
320 are unknown. Histological analysis revealed that meiosis was disrupted by 8 weeks of age and  
321 remained disrupted throughout life. Even transiently fertile PWKB6 males were distinctly  
322 different from reciprocal males in terms of their testis biology. On the other hand, the three  
323 focal hybrids had far more PMCs than the classic PWDB6 models of mouse HMS that have  
324 radically disorganized testes and few successful meioses [16, 18, 21]. These observations  
325 suggest that age-dependent HMS may be a threshold trait. If this hypothesis is true, PWKB6  
326 and PWKAJ males at age 8 weeks had reproductive parameters just below the necessary  
327 threshold for fertility. Some factor that increased reproductive output around age 20 weeks was  
328 just enough to push some but not all of these males across the minimum required sperm count  
329 for fertility. 20-week sperm counts were elevated for all the focal and reciprocal hybrid males  
330 except for PWK129S1. This supports a threshold trait hypothesis, and suggests that slight  
331 increases in reproductive output in this age range are a normal part of male reproductive  
332 biology. The delayed onset of fertility could have been due to these normal changes on the  
333 background of abnormal meiosis. These critical differences might be driven by changes in  
334 testosterone (T) levels with age. At sexual maturity, testosterone initiates a cascade of events  
335 culminating in fertility including the induction of spermatogenesis [48]. However, seminal

336 vesicle weights did not differ between sterile hybrids and their reciprocals ( $p = 0.155$ ), and  
337 continued to increase with age ( $p \leq 0.001$ ); seminal vesicle weights are considered a suitable  
338 proxy for assessing serum T levels [49, 50]. We cannot explicitly rule out changes in serum or  
339 gonadal T over time as a driver of age-dependent HMS, but mice do not typically exhibit  
340 significant decreases in serum T in advanced age [51]. Nonetheless, future studies should  
341 measure hormone levels to test this hypothesis directly. Whatever biological factor drives the  
342 sperm increase at 20 weeks, PWK129S1 males uniquely show no response. Identifying the  
343 biology of this critical transition will point the way to the modifier allele harbored by the 129S1  
344 mouse strain.

345 We expect both the delayed onset and premature cessation of sterility are linked to the  
346 depletion of PMCs observed at 8 weeks. However, it is unclear whether the proximal and  
347 genetic causes of the phenomena are the same. The reciprocal hybrid males showed no  
348 decline in reproductive parameters at 35 weeks. Furthermore, PWKWSB showed sterility at  
349 advanced age after a long period of fertility. Mitochondrial causes of age-related effects can be  
350 eliminated since all the focal hybrids inherited their mitochondria from a PWK dam, though  
351 mitochondrial-autosomal interactions cannot be ruled out.

352 An alternative mechanism for age-dependent decline is gene regulatory or epigenetic.  
353 *Prdm9* is a histone H3K4 methyltransferase and an essential epigenetic regulator of meiosis  
354 with the role of demarcating double-strand break sites where recombination will be initiated  
355 [28-31, 33]. This process is inherently sensitive to epigenetic changes. HMS modifier alleles  
356 could drive differential gene expression of target genes that directly interact with *Prdm9*, and  
357 that expression could be age dependent. A *Prdm9*-independent epigenetic mechanism is also  
358 possible. Faithful replication of epigenetic modifications is highly dependent on *trans*-acting  
359 genetic factors, in particular non-coding RNA (ncRNA, reviewed in [52]). Differentially  
360 expressed ncRNAs could alter the epigenomes of spermatogenic cells in a manner that  
361 renders them less competent to complete meiosis. Aberrant gene expression of Chr X has  
362 been repeatedly associated with HMS [24, 35, 37] and a compelling hypothesis is that HMS  
363 alleles impair both meiotic sex chromosome inactivation (MSCI) and postmeiotic sex chromatin  
364 repression (PSCR) [17, 25]. We saw a substantial number of seminiferous tubules with PMCs,  
365 even in sterile hybrid males. This suggests a majority of spermatogenic cells successfully  
366 underwent these processes. Detailed genomic studies across hybrids of different ages may  
367 identify key genes that mark the onset of sterility. Single-cell approaches may be especially  
368 appropriate given the divergent fates of individual spermatocytes.

369 In summary, we reported a wide range of male sterility in hybrid mice derived from the  
370 PWK strain. The differences between these hybrids were completely dependent on genetic  
371 background, which was invariant for genotypes previously associated with HMS at two major  
372 loci. We reported PWKDBA2 hybrid males as the only known mice to have these genotypes  
373 and yet completely escape HMS. Furthermore, we present the first known observation of HMS  
374 that onsets with age, and we characterized the unique fertility profiles associated with this age-  
375 dependent HMS. Taken together, these findings demonstrate both a novel phenotype and the  
376 classical inbred strains that harbor the relevant HMS modifier alleles. Identification of these  
377 modifiers will undoubtedly contribute to a growing body of work characterizing the genetic  
378 architecture of HMS in the mouse, and valuable insight into its mechanisms.

379

## 380 **Materials and Methods**

### 381 *Mice*

382 We generated F1 hybrid male mice by crossing PWK females to males of four inbred  
383 strains: 129S1, A/J, B6, and DBA2. Specific hybrids of this group will be collectively referred to  
384 as “focal hybrids” and individually referred to with the nomenclature “Dam Strain, Sire Strain”  
385 (i.e. PWK129S1 males are produced by crossing PWK females to 129S1 males). Focal hybrids  
386 (PWK129S1, PWKB6, PWKAJ, PWKDBA2) share *Prdm9*<sup>Dom2/Msc</sup> genotypes [15, 16, 18] and a  
387 are hemizygous for the PWK Chr X. We also bred the reciprocal hybrids (129S1PWK, AJPWK,  
388 B6PWK, and DBA2PWK) by crossing classical inbred strain females to PWK males. We also  
389 produced PWKWSB and WSBPWK hybrids, which carry *Prdm9*<sup>Dom3/Msc</sup>. All mice were fed soy-  
390 free Teklad mouse chow *ad-libitum*. All procedures involving animals were performed  
391 according to the Guide for the Care and Use of Laboratory Animals with approval by the  
392 Institutional Animal Care and Use Committee of North Carolina State University (NCSU) or the  
393 University of North Carolina at Chapel Hill (UNC-CH).

394

### 395 *Reproductive Phenotyping*

396 Males were euthanized using carbon dioxide asphyxiation followed by cervical  
397 dislocation to confirm death. Weights for the carcass, testes, epididymides, and seminal  
398 vesicles were recorded. Sperm counts were collected from the right caudal epididymis after  
399 harvest. The whole epididymis was incubated in 500  $\mu$ L of phosphate-buffered saline for at  
400 least 15 minutes at 37° C in an empty petri dish. Following incubation, the vas deferens and  
401 caput epididymis were removed and the cauda was snipped and incubated again for 15  
402 minutes at 37° C. After the second incubation, sperm were extruded from the cauda using  
403 curved forceps. Once the sperm suspension was collected in a microcentrifuge tube, the petri  
404 dish was rinsed with additional PBS to collect remaining suspension, bringing the final  
405 suspension volume to 1 mL. Sperm was counted using a NucleoCounter SP-100 sperm cell  
406 counter (Chemometec). Left testes were fixed in Bouin’s solution overnight, and serially  
407 washed in 25%, 50%, and 70% EtOH. Testes were then embedded in paraffin wax, sectioned  
408 at 5  $\mu$ m width, and stained according to a standard hematoxylin and eosin staining protocol.  
409 The number of seminiferous tubules containing post-meiotic cells was assessed in between 35  
410 and 50 seminiferous tubules from each testis by counting the number of such tubules that  
411 meet this requirement in each image and averaging over the number of seminiferous tubules  
412 counted from each testis.

413

### 414 *Fertility Testing*

415 We crossed 26 PWKB6, 6 PWKAJ, 3 PWKDBA2, and 6 B6PWK males to FVB females  
416 beginning between 5 and 8 weeks of age. Crosses were separated when FVB females were  
417 gravid or upon discovery of a litter, and continued only until 20 weeks of age when these mice  
418 were sacrificed for reproductive phenotyping. The age at which the male became fertile was  
419 calculated by subtracting 21 days from the litter’s birth date. Separately, we evaluated the  
420 fertility of 3 129S1PWK, 3 AJPWK, 2 B6PWK, 3 DBA2PWK, 3 WSBPWK, 3 PWK129S1, 5  
421 PWKAJ, and 7 PWKDBA2, as controls. Lastly, we tested PWKB6 and PWKWSB males in a  
422 separate experiment conducted at UNC-CH. PWKB6 male mice ( $n=63$ ) were continuously

423 crossed to FVB females beginning at ages between 13-25 weeks. PWKWSB male mice ( $n=55$ )  
424 were continuously crossed to FVB females beginning at average age 21 weeks. Crosses were  
425 continually checked for litters until males ceased producing litters.

426

#### 427 *Subspecific ancestry*

428 Subspecific ancestry tracks for the 129S1, A/J, B6, DBA2, and PWK genomes were  
429 publically-available from the Mouse Phylogeny Viewer (<http://msub.csbio.unc.edu/>) [13, 42].  
430 Each of the *domesticus* genomes was scanned for shared subspecific ancestry with PWK  
431 using the *Granges* package implemented through Bioconductor [53]. Shared genomic regions  
432 were then classified by whether were unique to an inbred strain (i.e. only 129S1 and PWK  
433 share common ancestry), or whether they shared subspecific ancestry with strains that, when  
434 crossed to PWK females, produce sterile hybrids at 8 weeks of age (129S1, A/J, and B6),  
435 fertile hybrids at 20 weeks of age (A/J, B6, DBA2), or hybrids that display age-dependent  
436 fertility with incomplete penetrance (A/J and B6). Genomic regions that shared PWK  
437 subspecific ancestry were then queried for known genes using the UCSC mouse genome table  
438 browser. We then queried these gene sets in the Mouse Genome Informatics database  
439 (Jackson Laboratory) for genes previously implicated in male reproductive system function.

440

#### 441 *Statistical Analysis*

442 We compared focal hybrids and their corresponding reciprocals using 2-way Analysis  
443 of Variance (ANOVA) and Tukey Honestly Significant Difference (HSD) test. We compared a  
444 specific focal hybrid and its reciprocal using Welch's t-test, which accounts for unequal sample  
445 variances. We compared the four focal hybrids using 1-way ANOVA and HSD. We compared a  
446 specific focal hybrid and its reciprocal across ages using 2-way ANOVA and HSD. We  
447 compared a specific hybrid across ages using a 1-way ANOVA and HSD. We compared  
448 multiple focal hybrids across ages using 2-way ANOVA and HSD. We performed all statistical  
449 tests using R 3.3.1 software.

450

#### 451 **Acknowledgements**

452 We thank Aylor lab members Nicole Allard, Thomas Konneker, Connor McKenney, and  
453 Pei-Li Yao for helpful feedback and technical assistance, and the staff of the North Carolina  
454 State University Biological Resources Facility. We thank Jim Crowley for sharing his initial  
455 observation of premature sterility in PWKWSB hybrids. We thank Fernando Pardo-Manuel de  
456 Villena and Tim Bell at the University of North Carolina-Chapel Hill for supporting the breeding  
457 experiment of PWKB6 and PWKWSB hybrid males.

458

#### 459 **Financial Disclosure Statement**

460 This work was supported in part by NIGMS F32GM090667 (DLA) and NIEHS  
461 K99/R00ES021535 (DLA). The funders had no role in study design, data collection and  
462 analysis, decision to publish, or preparation of the manuscript.

463 **Figure 1: Crossing scheme to generate genetically diverse hybrid male mice.** A) We  
464 generated focal hybrid males by crossing PWK (black) females to males of four classical  
465 inbred mouse strains: 129S1, A/J, B6, and DBA2 (stippled). These four strains all carry the  
466 *Prdm9*<sup>Dom2</sup> allele that has been previously linked to HMS in other crosses. Focal mice are fixed  
467 for the *Prdm9*<sup>Dom2/Msc</sup> genotype and PWK Chr X, eliminating the effects of those major HMS  
468 loci. B) Reciprocal hybrids were generated by reversing the cross direction.

469  
470 **Figure 2: Reproductive phenotypes of 8-week old hybrid male mice vary across genetic**  
471 **backgrounds.** A) Combined testes weight, B) sperm count, and C) percent of seminiferous  
472 tubules containing post-meiotic germ cells (PMCs) show significant variation between  
473 genetically distinct hybrids. Only PWKDBA2 hybrid males displayed phenotypes consistent  
474 with fertility at 8 weeks of age. D) Histological cross section of a representative PWK129S1, E)  
475 PWKB6, F) PWKAJ, and G) PWKDBA2 testis. PWKDBA2 seminiferous tubules contain  
476 abundant spermatids and spermatozoa, while many PWK129S1, PWKAJ, and PWKB6 tubules  
477 contain few to no spermatids, indicative of partial meiotic arrest.

478  
479 **Figure 3: Inter-individual variation and age-dependence of fertility among PWKB6**  
480 **hybrids.** Fertility curve constructed from combining two breeding experiments. HMS had a  
481  $\geq 60\%$  penetrance, but some mice were fertile at ages 15-35 weeks. One experiment was  
482 designed to determine the age of fertility onset. The other found the cessation of fertility by age  
483 35 weeks.

484  
485 **Figure 4: Genetic background dependent changes to HMS phenotypes over time.** Testes  
486 weight, sperm count, and the percentage of seminiferous tubules containing post-meiotic germ  
487 cells (PMCs) across three ages: 8 weeks, 20 weeks, and 35 weeks of age.

488  
489 **Figure 5: Subspecies haplotype sharing among inbred strains reveal candidate**  
490 **incompatibility loci.** A) Contrasting patterns of subspecific ancestry among inbred strains that  
491 contribute to the observed phenotypes. Shared regions between PWK and DBA2 (green) may  
492 harbor alleles that rescue fertility in PWKDBA2 males. Regions shared between PWK, A/J, and  
493 B6 (blue) or regions shared privately between B6 and A/J (orange) may associate with age-  
494 dependent HMS. Private incompatibilities between PWK and 129S1 (red) may underlie the  
495 complete sterility of PWK129S1 males. B) Chromosome plots (gray) map the haplotype  
496 sharing patterns from panel A. Black bars indicate the location of QTL identified in previous  
497 studies of HMS.

498

499 **Supporting Information Legends**

500

501 **S1: Phenotype summary statistics.** Combined testes weight, sperm count, and percentage  
502 of seminiferous tubules containing postmeiotic cells (PMCs) across PWK-derived hybrids at  
503 each age point (Mean  $\pm$  SE).

504

505 **S2: Genomic regions exhibiting specific patterns of subspecies haplotype sharing.**  
506 Chromosome, start sites, stop sites, and interval width expressed in megabases (Mb).

## 507 **References**

- 508 1. Dobzhansky T. Genetics and the origin of species. New York: Columbia University  
509 Press; 1937.
- 510 2. Muller HJ. Isolating mechanisms, evolution, and temperature. *Biol Symp.* 1942;6:71-  
511 125.
- 512 3. Orr HA. The population genetics of speciation: The evolution of hybrid incompatibilities.  
513 *Genetics.* 1995;139:1805-13. doi: 10.1534/genetics.107.081810.
- 514 4. Boursot P, Auffray JC, Britton-Davidian J, Bonhomme F. The Evolution of House Mice.  
515 *Annual Review of Ecology and Systematics.* 1993;24(1993):119-52. doi:  
516 10.1146/annurev.es.24.110193.001003.
- 517 5. Boursot P, Din W, Anand R, Darviche D, Dod B, VonDeimling F, et al. Origin and  
518 radiation of the house mouse: Mitochondrial DNA phylogeny. *Journal of Evolutionary Biology.*  
519 1996;9(4):391-415. doi: 10.1046/j.1420-9101.1996.9040391.x.
- 520 6. Phifer-Rixey M, Nachman MW. Insights into mammalian biology from the wild house  
521 mouse *Mus musculus*. *eLife.* 2015;4:1-13. doi: 10.7554/eLife.05959.
- 522 7. Geraldès A, Basset P, Gibson B, Smith KL, Harr B, Yu HT, et al. Inferring the history of  
523 speciation in house mice from autosomal, X-linked, Y-linked and mitochondrial genes.  
524 *Molecular Ecology.* 2008;17(24):5349-63. doi: 10.1111/j.1365-294X.2008.04005.x.
- 525 8. Tucker PK, Sage RD, Warner J, Wilson aC, Eicher EM. Abrupt Cline for Sex  
526 Chromosomes in a Hybrid Zone between Two Species of Mice. *Evolution.* 1992;46(4):1146-63.
- 527 9. Teeter KC, Payseur BA, Harris LW, Bakewell MA, Thibodeau LM, O'Brien JE, et al.  
528 Genome-wide patterns of gene flow across a house mouse hybrid zone. *Genome Research.*  
529 2008;18(1):67-76. doi: 10.1101/gr.6757907.
- 530 10. Janousek V, Wang L, Luzynski K, Dufková P, Vyskočilová MM, Nachman MW, et al.  
531 Genome-wide architecture of reproductive isolation in a naturally occurring hybrid zone  
532 between *Mus musculus musculus* and *M. m. domesticus*. *Molecular Ecology.* 2012;21:3032-  
533 47. doi: 10.1111/j.1365-294X.2012.05583.x.
- 534 11. Turner LM, Schwahn DJ, Harr B. Reduced male fertility is common but highly variable in  
535 form and severity in a natural house mouse hybrid zone. *Evolution.* 2012;66:443-58. doi:  
536 10.1111/j.1558-5646.2011.01445.x.
- 537 12. Gregorová S, Forejt J. PWD/Ph and PWK/Ph inbred mouse strains of *Mus m. musculus*  
538 subspecies - A valuable resource of phenotypic variations and genomic polymorphisms. *Folia*  
539 *Biologica.* 2000;46(1):31-41.
- 540 13. Yang H, Wang JR, Didion JP, Buus RJ, Bell TA, Welsh CE, et al. Subspecific origin and  
541 haplotype diversity in the laboratory mouse. *Nature Genetics.* 2012;43(7):648-55. doi:  
542 10.1038/ng.847.Subspecific.
- 543 14. Good JM, Handel MA, Nachman MW. Asymmetry and polymorphism of hybrid male  
544 sterility during the early stages of speciation in house mice. *Evolution.* 2008;62(1):50-65. doi:  
545 10.1111/j.1558-5646.2007.00257.x.ASYMMETRY.



- 546 15. Mihola O, Trachtulec Z, Vlcek C, Schimenti JC, Forejt J. A mouse speciation gene  
547 encodes a meiotic histone H3 methyltransferase. *Science (New York, NY)*.  
548 2009;323(5912):373-5. doi: 10.1126/science.1163601.
- 549 16. Flachs P, Mihola O, Šimeček P, Gregorová S, Schimenti JC, Matsui Y, et al. Interallelic  
550 and Intergenic Incompatibilities of the Prdm9 (Hst1) Gene in Mouse Hybrid Sterility. *PLoS*  
551 *Genetics*. 2012;8(11). doi: 10.1371/journal.pgen.1003044.
- 552 17. Bhattacharyya T, Gregorova S, Mihola O, Anger M, Sebestova J, Denny P. Mechanistic  
553 basis of infertility of mouse intersubspecific hybrids. *PNAS*. 2013;110(6):E468-77. doi:  
554 <https://doi.org/10.1073/pnas.1219126110>.
- 555 18. Flachs P, Bhattacharyya T, Mihola O, Piálek J, Forejt J, Trachtulec Z. Prdm9  
556 incompatibility controls oligospermia and delayed fertility but no selfish transmission in mouse  
557 intersubspecific hybrids. *PLoS ONE*. 2014;9(4). doi: 10.1371/journal.pone.0095806.
- 558 19. Davies AB, Hatton E, Altemose N, Hussin JG, Pratto F, Zhang G, et al. Re-engineering  
559 the zinc fingers of PRDM9 reverses hybrid sterility in mice. *Nature*. 2016;530(7589):171-6. doi:  
560 10.1038/nature16931.
- 561 20. Hayashi K, Yoshida K, Matsui Y. A histone H3 methyltransferase controls epigenetic  
562 events required for meiotic prophase. *Nature*. 2005;438(November):374-8. doi:  
563 10.1038/nature04112.
- 564 21. Bhattacharyya T, Reifova R, Gregorova S, Simecek P, Gergelits V, Mistrik M, et al. X  
565 Chromosome Control of Meiotic Chromosome Synapsis in Mouse Inter-Subspecific Hybrids.  
566 *PLoS Genetics*. 2014;10(2). doi: 10.1371/journal.pgen.1004088.
- 567 22. Dzur-Gejdosova M, Simecek P, Gregorova S, Bhattacharyya T, Forejt J. Dissecting the  
568 Genetic Architecture of F1 Hybrid Sterility in House Mice. *Evolution*. 2012;66:3321-35. doi:  
569 10.5061/dryad.9cp1f.
- 570 23. Balcova M, Faltusova B, Gergelits V, Bhattacharyya T. Hybrid Sterility Locus on  
571 Chromosome X Controls Meiotic Recombination Rate in Mouse. *PLoS Genetics*. 2016;12(4).  
572 doi: doi:10.1371/journal.pgen.1005906.
- 573 24. Larson EL, Keeble S, Vanderpool D, Dean MD, Good JM. The Composite Regulatory  
574 Basis of the Large X-Effect in Mouse Speciation. *Molecular Biology and Evolution*.  
575 2017;34(2):282-95. doi: 10.1093/molbev/msw243.
- 576 25. Campbell P, Good JM, Nachman MW. Meiotic sex chromosome inactivation is disrupted  
577 in sterile hybrid male house mice. *Genetics*. 2013;193(March):819-28. doi:  
578 10.1534/genetics.112.148635.
- 579 26. Good JM, Giger T, Dean MD, Nachman MW. Widespread over-expression of the X  
580 chromosome in sterile F1 hybrid mice. *PLoS genetics*. 2010;6(9):e1001148-e. doi:  
581 10.1371/journal.pgen.1001148.
- 582 27. Baudat F, Buard J, Grey C, Fledel-Alon A, Ober C, Przeworski M, et al. Prdm9 is a  
583 major determinant of meiotic recombination hotspots in humans and mice. *Science*.  
584 2010;327(February):836-40. doi: 10.1044/2014.
- 585 28. Parvanov ED, Petkov PM, Paigen K. Prdm9 controls activation of mammalian  
586 recombination hotspots. *Science*. 2010;327(February):835-.

- 587 29. Baker CL, Kajita S, Walker M, Saxl RL, Raghupathy N, Choi K, et al. PRDM9 Drives  
588 Evolutionary Erosion of Hotspots in *Mus musculus* through Haplotype-Specific Initiation of  
589 Meiotic Recombination. *PLoS genetics*. 2015;11(1):e1004916-e. doi:  
590 10.1371/journal.pgen.1004916.
- 591 30. Baker CL, Walker M, Kajita S, Petkov PM, Paigen K. PRDM9 binding organizes hotspot  
592 nucleosomes and limits Holliday junction migration. *Genome research*. 2014;24(5):724-32. doi:  
593 10.1101/gr.170167.113.
- 594 31. Brick K, Smagulova F, Khil P, Camerini-Otero RD, Petukhova GV. Genetic  
595 recombination is directed away from functional genomic elements in mice. *Nature*.  
596 2012;485(7400):642-5. doi: 10.1038/nature11089.
- 597 32. Walker M, Billings T, Baker CL, Powers N, Tian H, Saxl RL, et al. Affinity-seq detects  
598 genome-wide PRDM9 binding sites and reveals the impact of prior chromatin modifications on  
599 mammalian recombination hotspot usage. *Epigenetics & Chromatin*. 2015;8:13. doi:  
600 10.1186/s13072-015-0024-6.
- 601 33. Grey C, Barthès P, Friec G, Langa F, Baudat F, de Massy B. Mouse Prdm9 DNA-  
602 binding specificity determines sites of histone H3 lysine 4 trimethylation for initiation of meiotic  
603 recombination. *PLoS Biology*. 2011;9(10):1-9. doi: 10.1371/journal.pbio.1001176.
- 604 34. Gregorova S, Gergelits V, Chvatalova I, Bhattacharyya T, Valiskova B, Fotopulosova V,  
605 et al. Modulation of Prdm9-controlled meiotic chromosome asynapsis overrides hybrid sterility  
606 in mice. *Elife*. 2018;7. doi: 10.7554/eLife.34282. PubMed PMID: 29537370.
- 607 35. Turner LM, Harr B. Genome-wide mapping in a house mouse hybrid zone reveals  
608 hybrid sterility loci and Dobzhansky-Muller interactions. *eLife*. 2014;3(2002):1-25. doi:  
609 10.7554/eLife.02504.
- 610 36. White MA, Steffy B, Wiltshire T, Payseur BA. Genetic dissection of a key reproductive  
611 barrier between nascent species of house mice. *Genetics*. 2011;189(1):289-304. doi:  
612 10.1534/genetics.111.129171.
- 613 37. Turner LM, White MA, Tautz D, Payseur BA. Genomic networks of hybrid sterility. *PLoS*  
614 *genetics*. 2014;10(2):e1004162-e. doi: 10.1371/journal.pgen.1004162.
- 615 38. Larson EL, Vanderpool D, Sarver BAJ, Callahan C, Keeble S, Provencio LP, et al. The  
616 Evolution of Polymorphic Hybrid Incompatibilities in House Mice. *Genetics*. 2018. doi:  
617 10.1534/genetics.118.300840.
- 618 39. Consortium CC. The Genome Architecture of the Collaborative Cross Mouse Genetic  
619 Reference Population. *Genetics*. 2012;190(2):389-401. doi: 10.1534/genetics.111.132639.
- 620 40. Churchill GA, Airey DC, Allayee H, Angel JM, Attie AD, Beatty J, et al. The Collaborative  
621 Cross, a community resource for the genetic analysis of complex traits. *Nature genetics*.  
622 2004;36(11):1133-7. doi: 10.1038/ng1104-1133.
- 623 41. Chesler EJ, Miller DR, Branstetter LR, Galloway LD, Jackson BL, Philip VM, et al. The  
624 Collaborative Cross at Oak Ridge National Laboratory: developing a powerful resource for  
625 systems genetics. *Mammalian Genome*. 2008;19(6):382-9. doi: 10.1007/s00335-008-9135-8.

- 626 42. Wang JR, de Villena FP, McMillan L. Comparative analysis and visualization of multiple  
627 collinear genomes. *BMC Bioinformatics*. 2012;13 Suppl 3:S13. doi: 10.1186/1471-2105-13-S3-  
628 S13. PubMed PMID: 22536897; PubMed Central PMCID: PMC3311102.
- 629 43. Payseur BA, Krenz JG, Nachman MW. Differential patterns of introgression across the  
630 X chromosome in a hybrid zone between two species of house mice. *Evolution; international  
631 journal of organic evolution*. 2004;58(9):2064-78. doi: 10.1554/03-738.
- 632 44. Aylor DL, Valdar W, Foulds-mathes W, Buus RJ, Verdugo RA, Baric RS, et al. Genetic  
633 analysis of complex traits in the emerging Collaborative Cross. 2011;(Churchill 2007):1213-22.  
634 doi: 10.1101/gr.111310.110.mentally.
- 635 45. Churchill GA, Gatti DM, Munger SC, Svenson KL. The Diversity Outbred mouse  
636 population. *Mamm Genome*. 2012;23(9-10):713-8. doi: 10.1007/s00335-012-9414-2. PubMed  
637 PMID: 22892839; PubMed Central PMCID: PMC3524832.
- 638 46. Shorter JR, Odet F, Aylor DL, Pan W, Kao CY, Fu CP, et al. Male Infertility Is  
639 Responsible for Nearly Half of the Extinction Observed in the Mouse Collaborative Cross.  
640 *Genetics*. 2017;206(2):557-72. doi: 10.1534/genetics.116.199596. PubMed PMID: 28592496.
- 641 47. Welsh CE, McMillan L. Accelerating the inbreeding of multi-parental recombinant inbred  
642 lines generated by sibling matings. *G3 (Bethesda)*. 2012;2(2):191-8. doi:  
643 10.1534/g3.111.001784. PubMed PMID: 22384397; PubMed Central PMCID: PMC3284326.
- 644 48. Singh J, Oneill C, Handelsman DJ. Induction of spermatogenesis by androgens in  
645 gonadotropin-deficient (hpg) mice. *Endocrinology*. 1995;136(12):5311-21. doi:  
646 10.1210/en.136.12.5311.
- 647 49. Bartke A, Shire JGM. Differences between mouse strains in testicular cholesterol levels  
648 and androgen target organs. *Journal of Endocrinology*. 1972;55(1):173-84. doi:  
649 10.1677/joe.0.0550173.
- 650 50. Bartke A. Increased sensitivity of seminal vesicles to testosterone in a mouse strain with  
651 low plasma testosterone levels. *Journal of Endocrinology*. 1974;60(1):145-8. doi:  
652 10.1677/joe.0.0600145.
- 653 51. Eleftheriou BE, Lucas LA. Age-related changes in testes, seminal vesicles and plasma  
654 testosterone levels in male mice. *Gerontologia*. 1974;20(4):231-8.
- 655 52. Margueron R, Reinberg D. Chromatin structure and the inheritance of epigenetic  
656 information. *Nature Reviews Genetics*. 2010;11(4):285-96. doi: 10.1038/nrg2752.
- 657 53. Lawrence M, Huber W, Pages H, Aboyoun P, Carlson M, Gentleman R, et al. Software  
658 for computing and annotating genomic ranges. *PLoS Comput Biol*. 2013;9(8):e1003118. doi:  
659 10.1371/journal.pcbi.1003118. PubMed PMID: 23950696; PubMed Central PMCID:  
660 PMC3738458.
- 661

**A**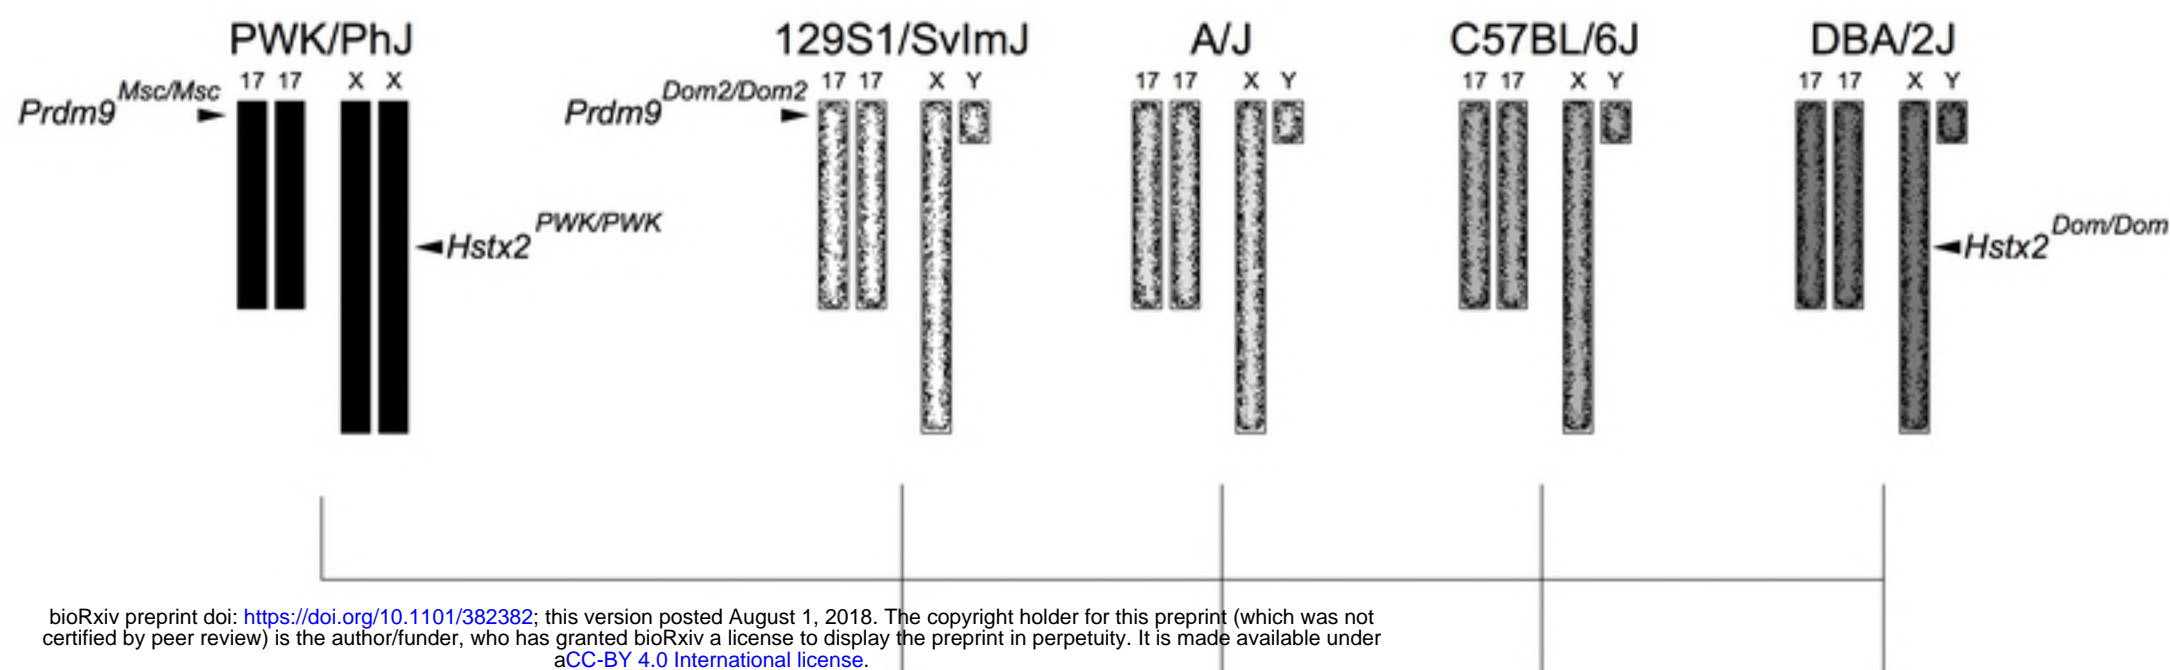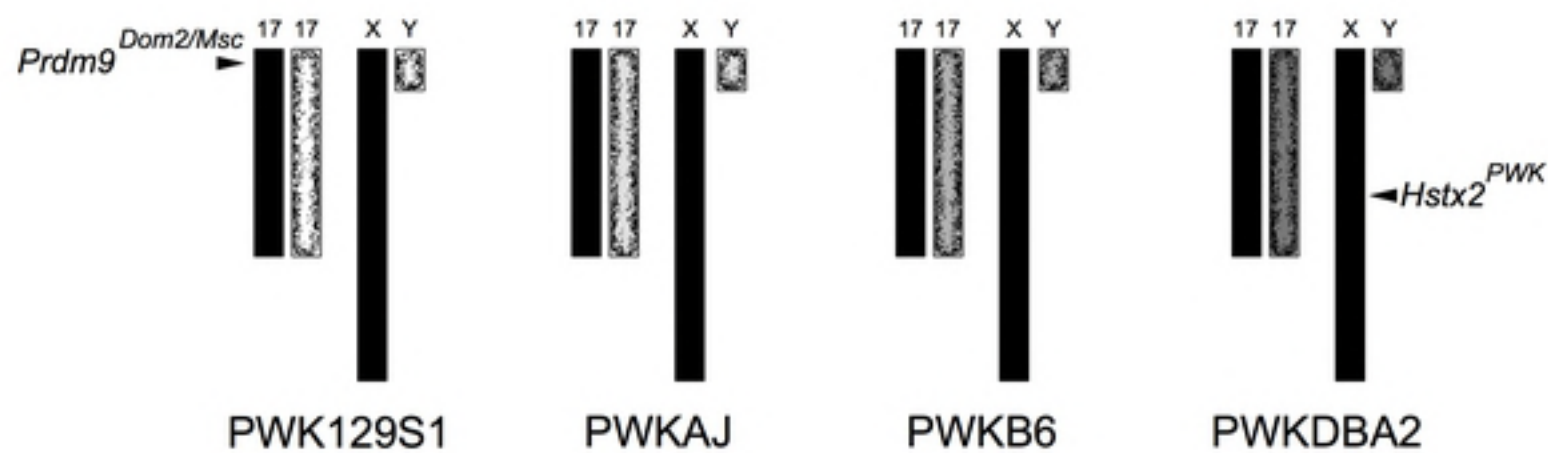**B**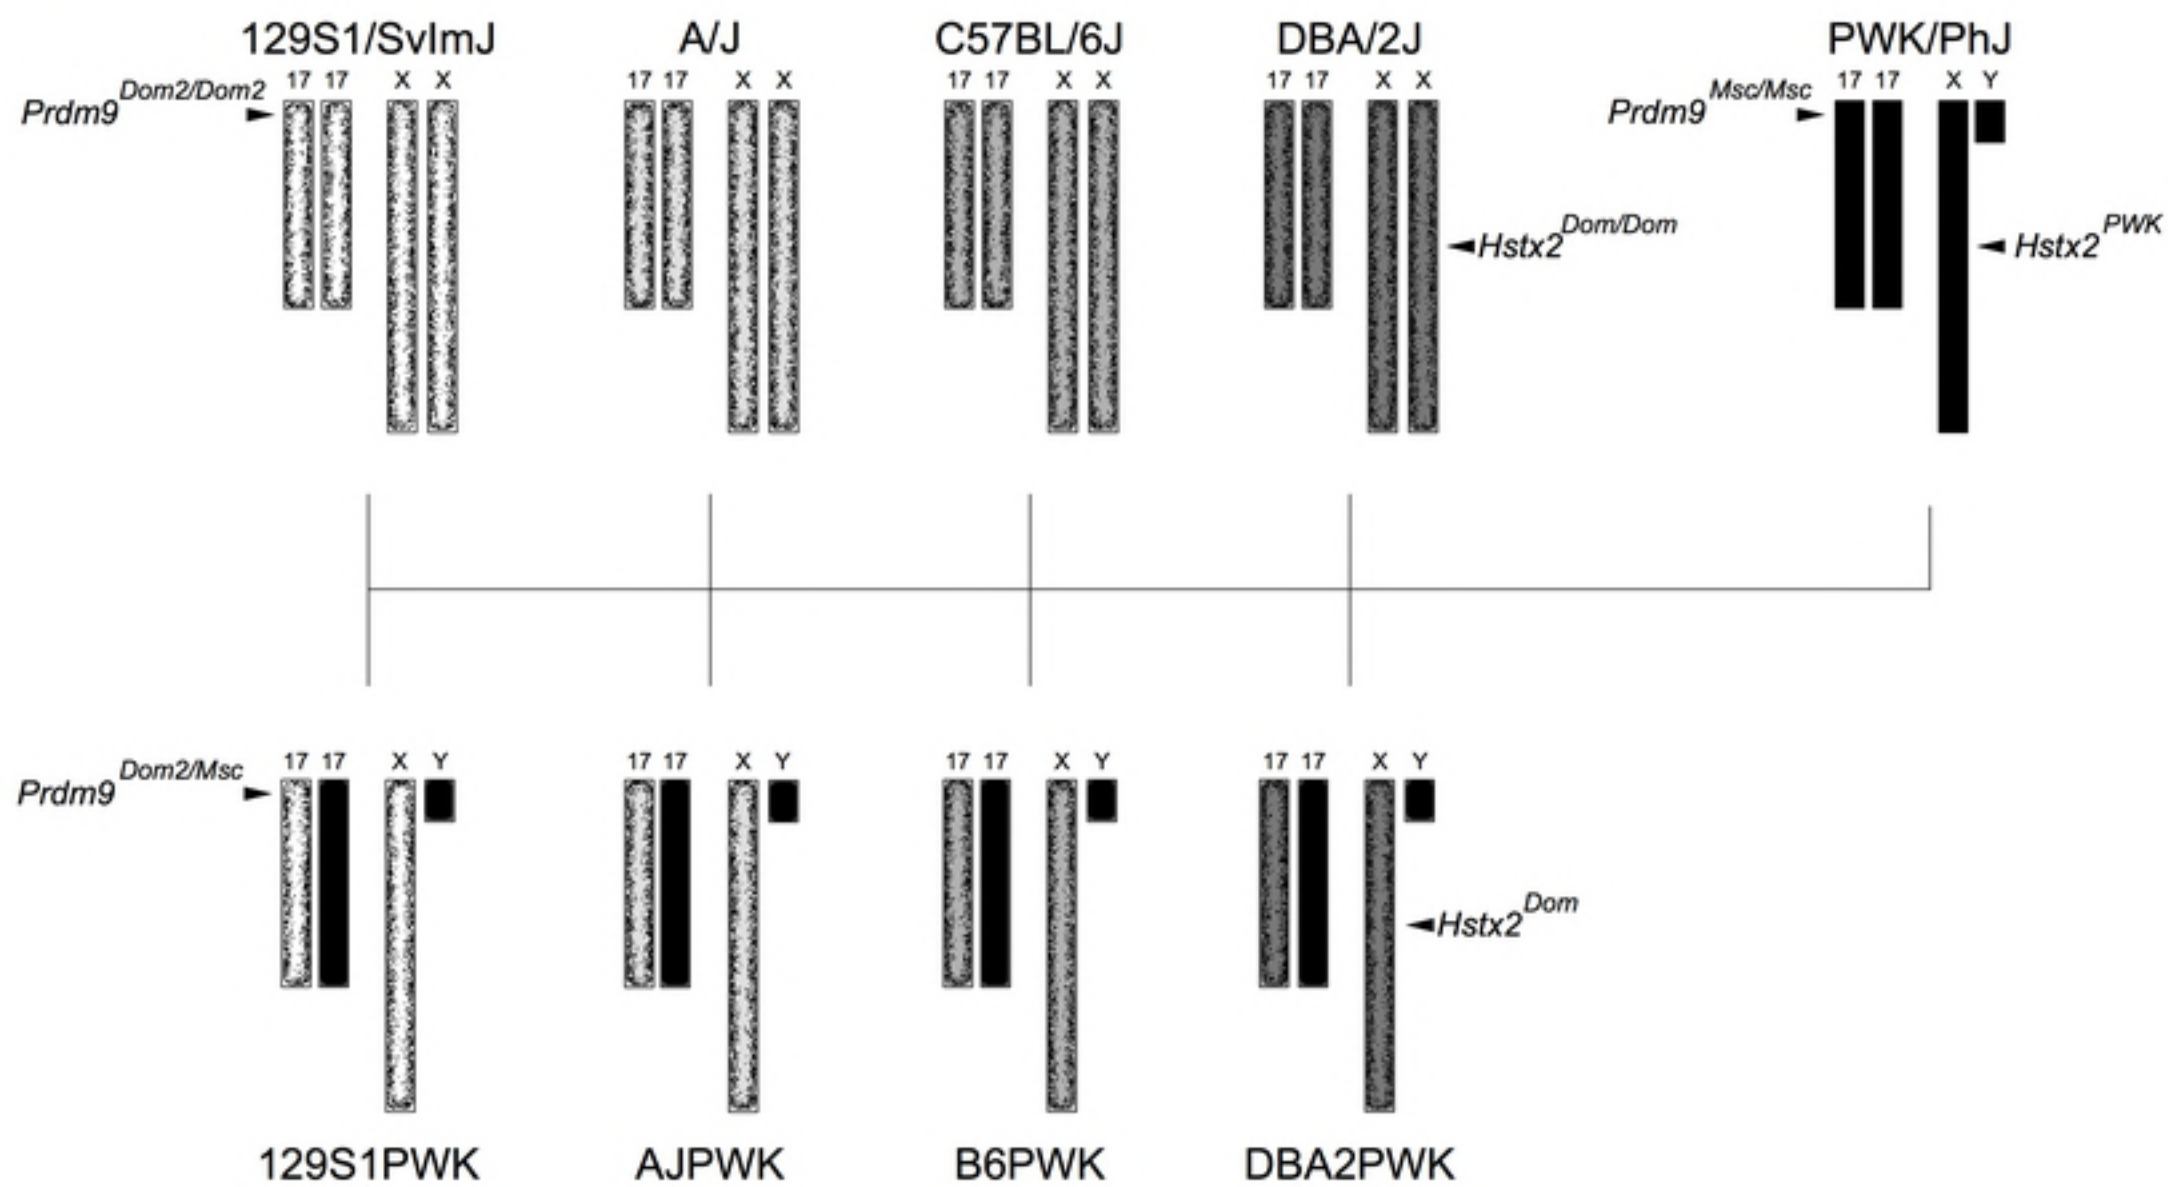

**A**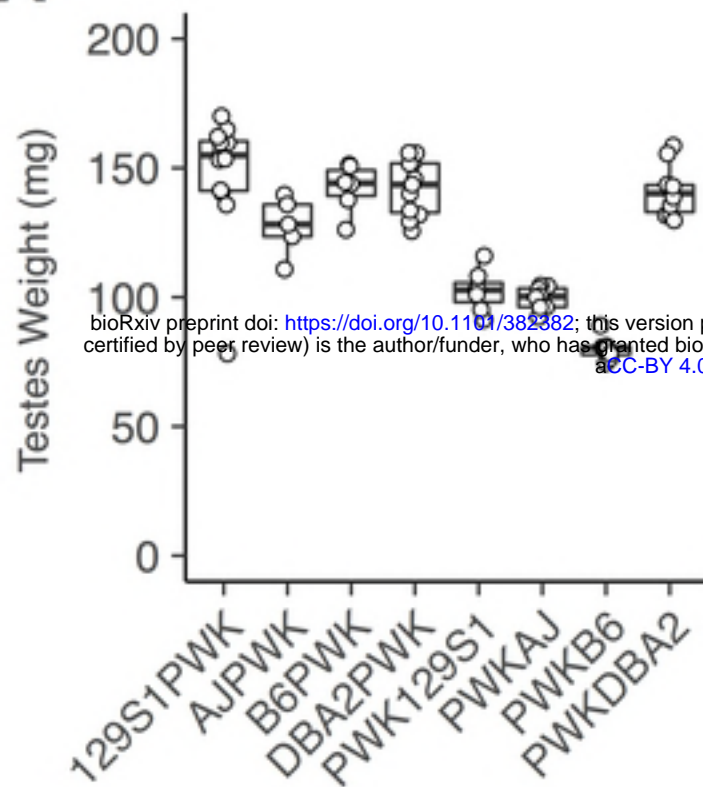**B**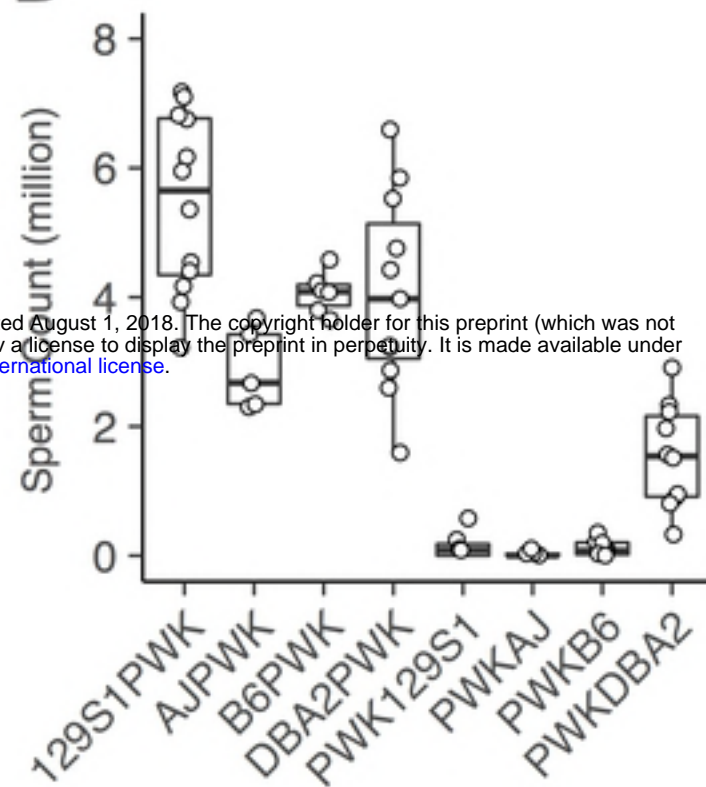**C**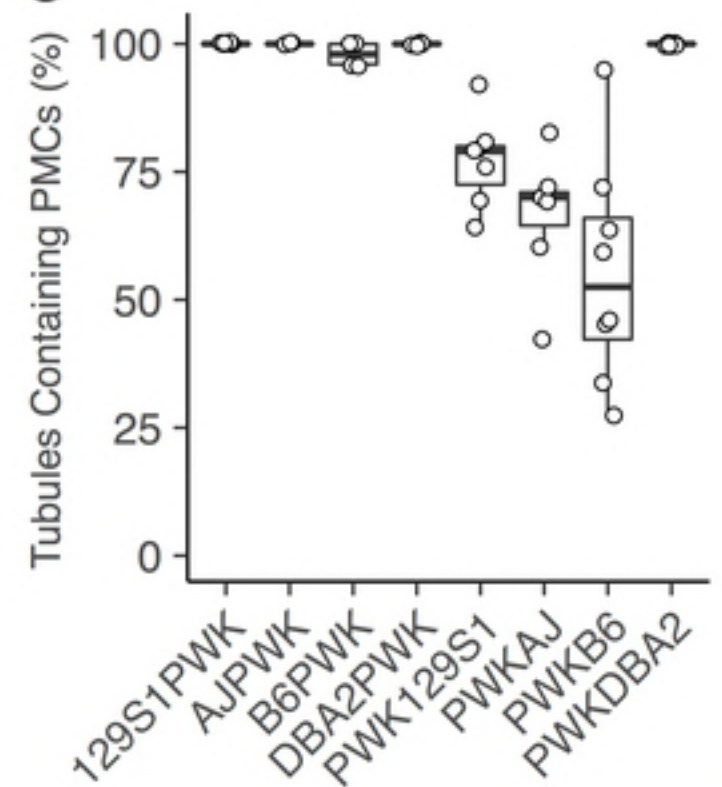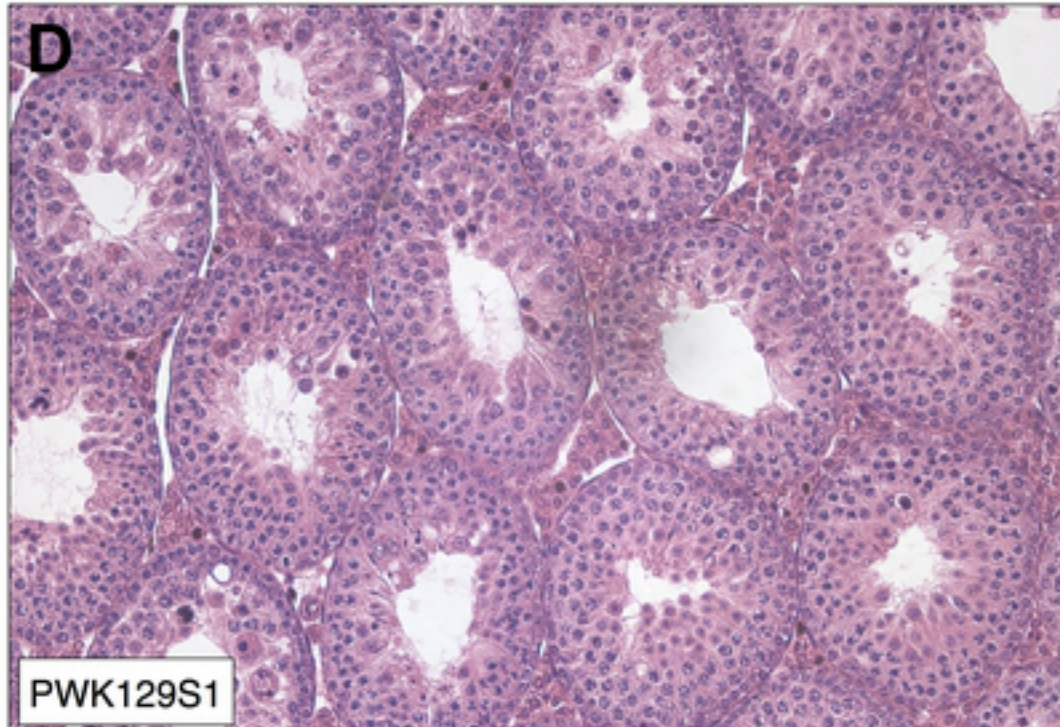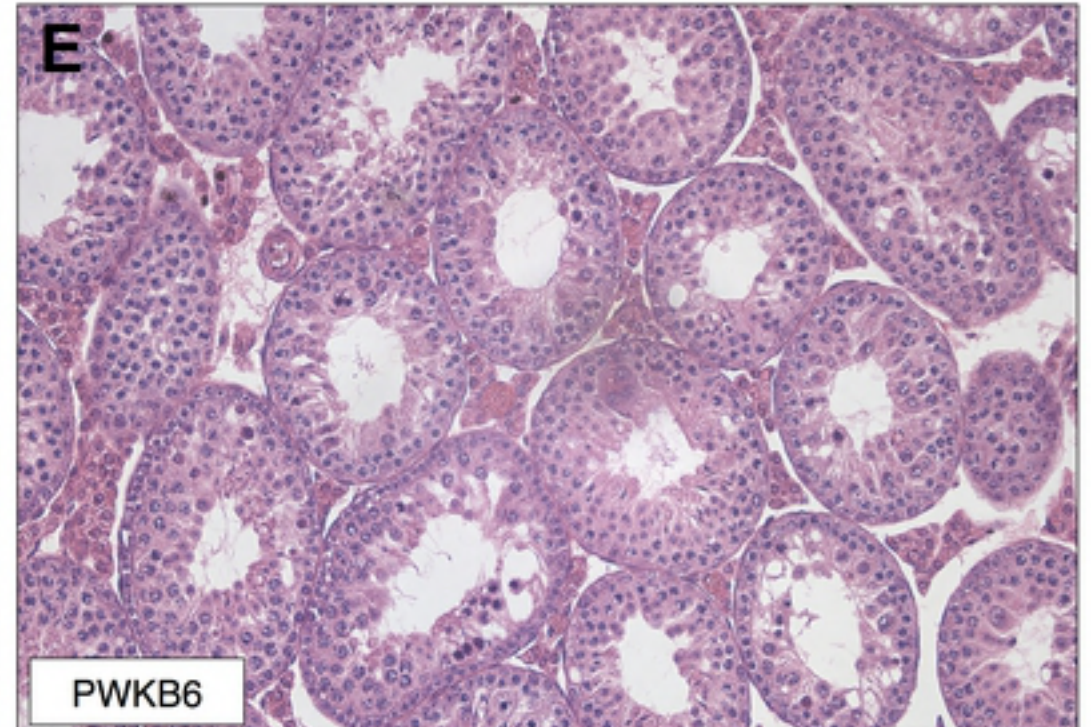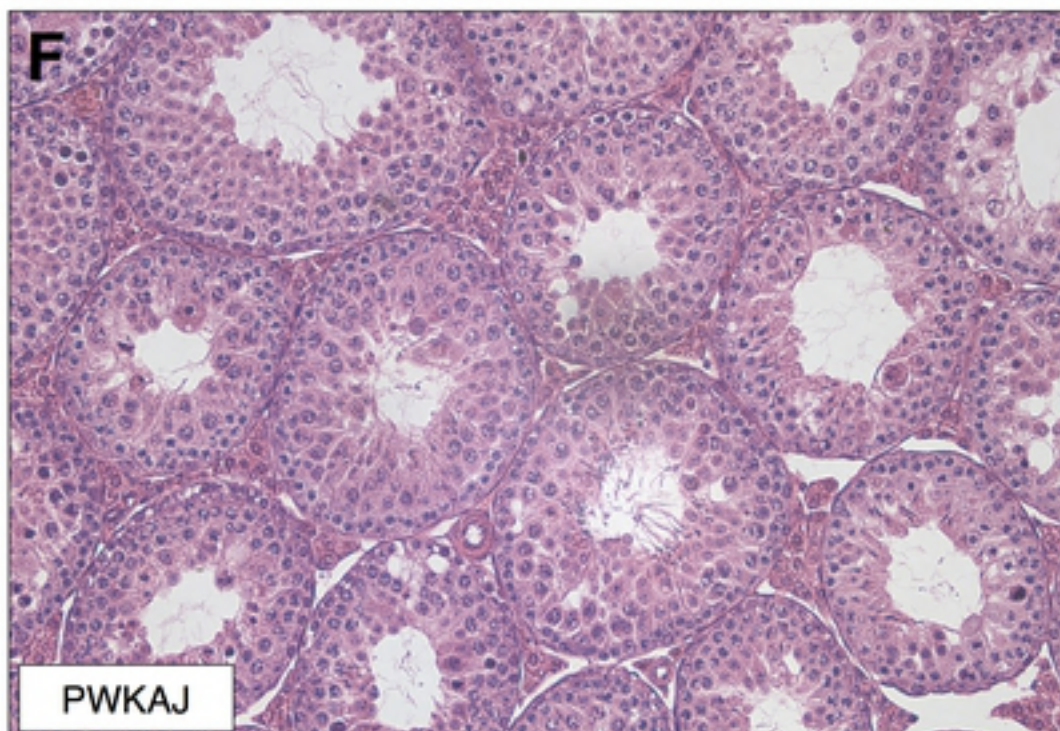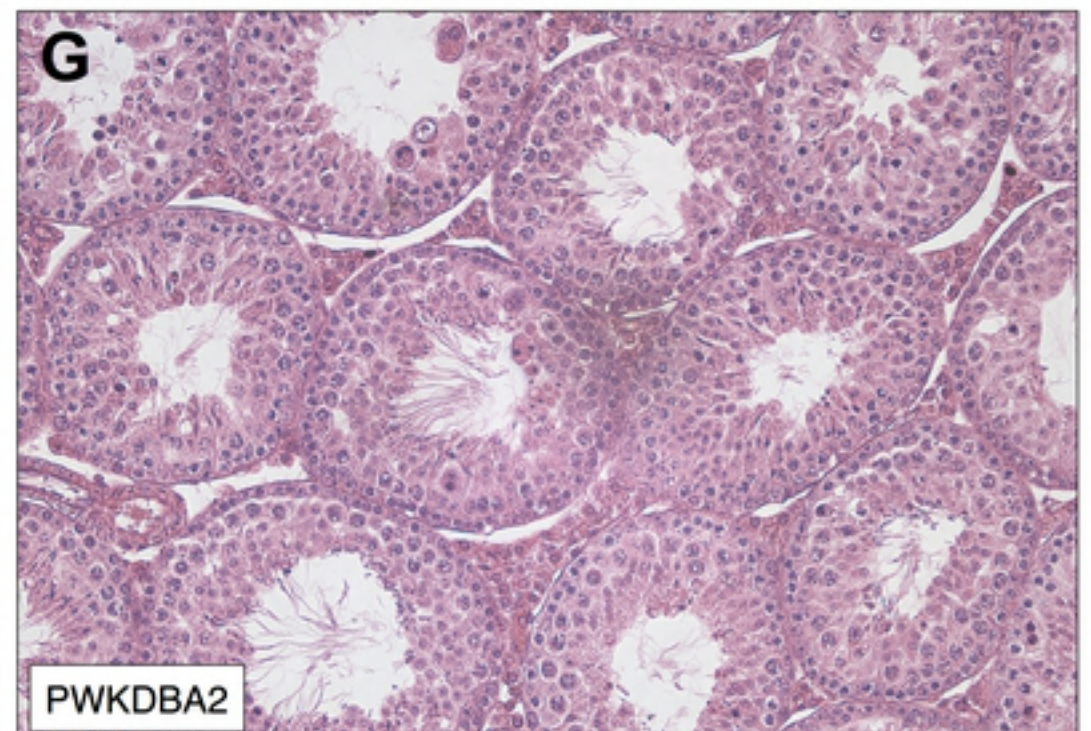

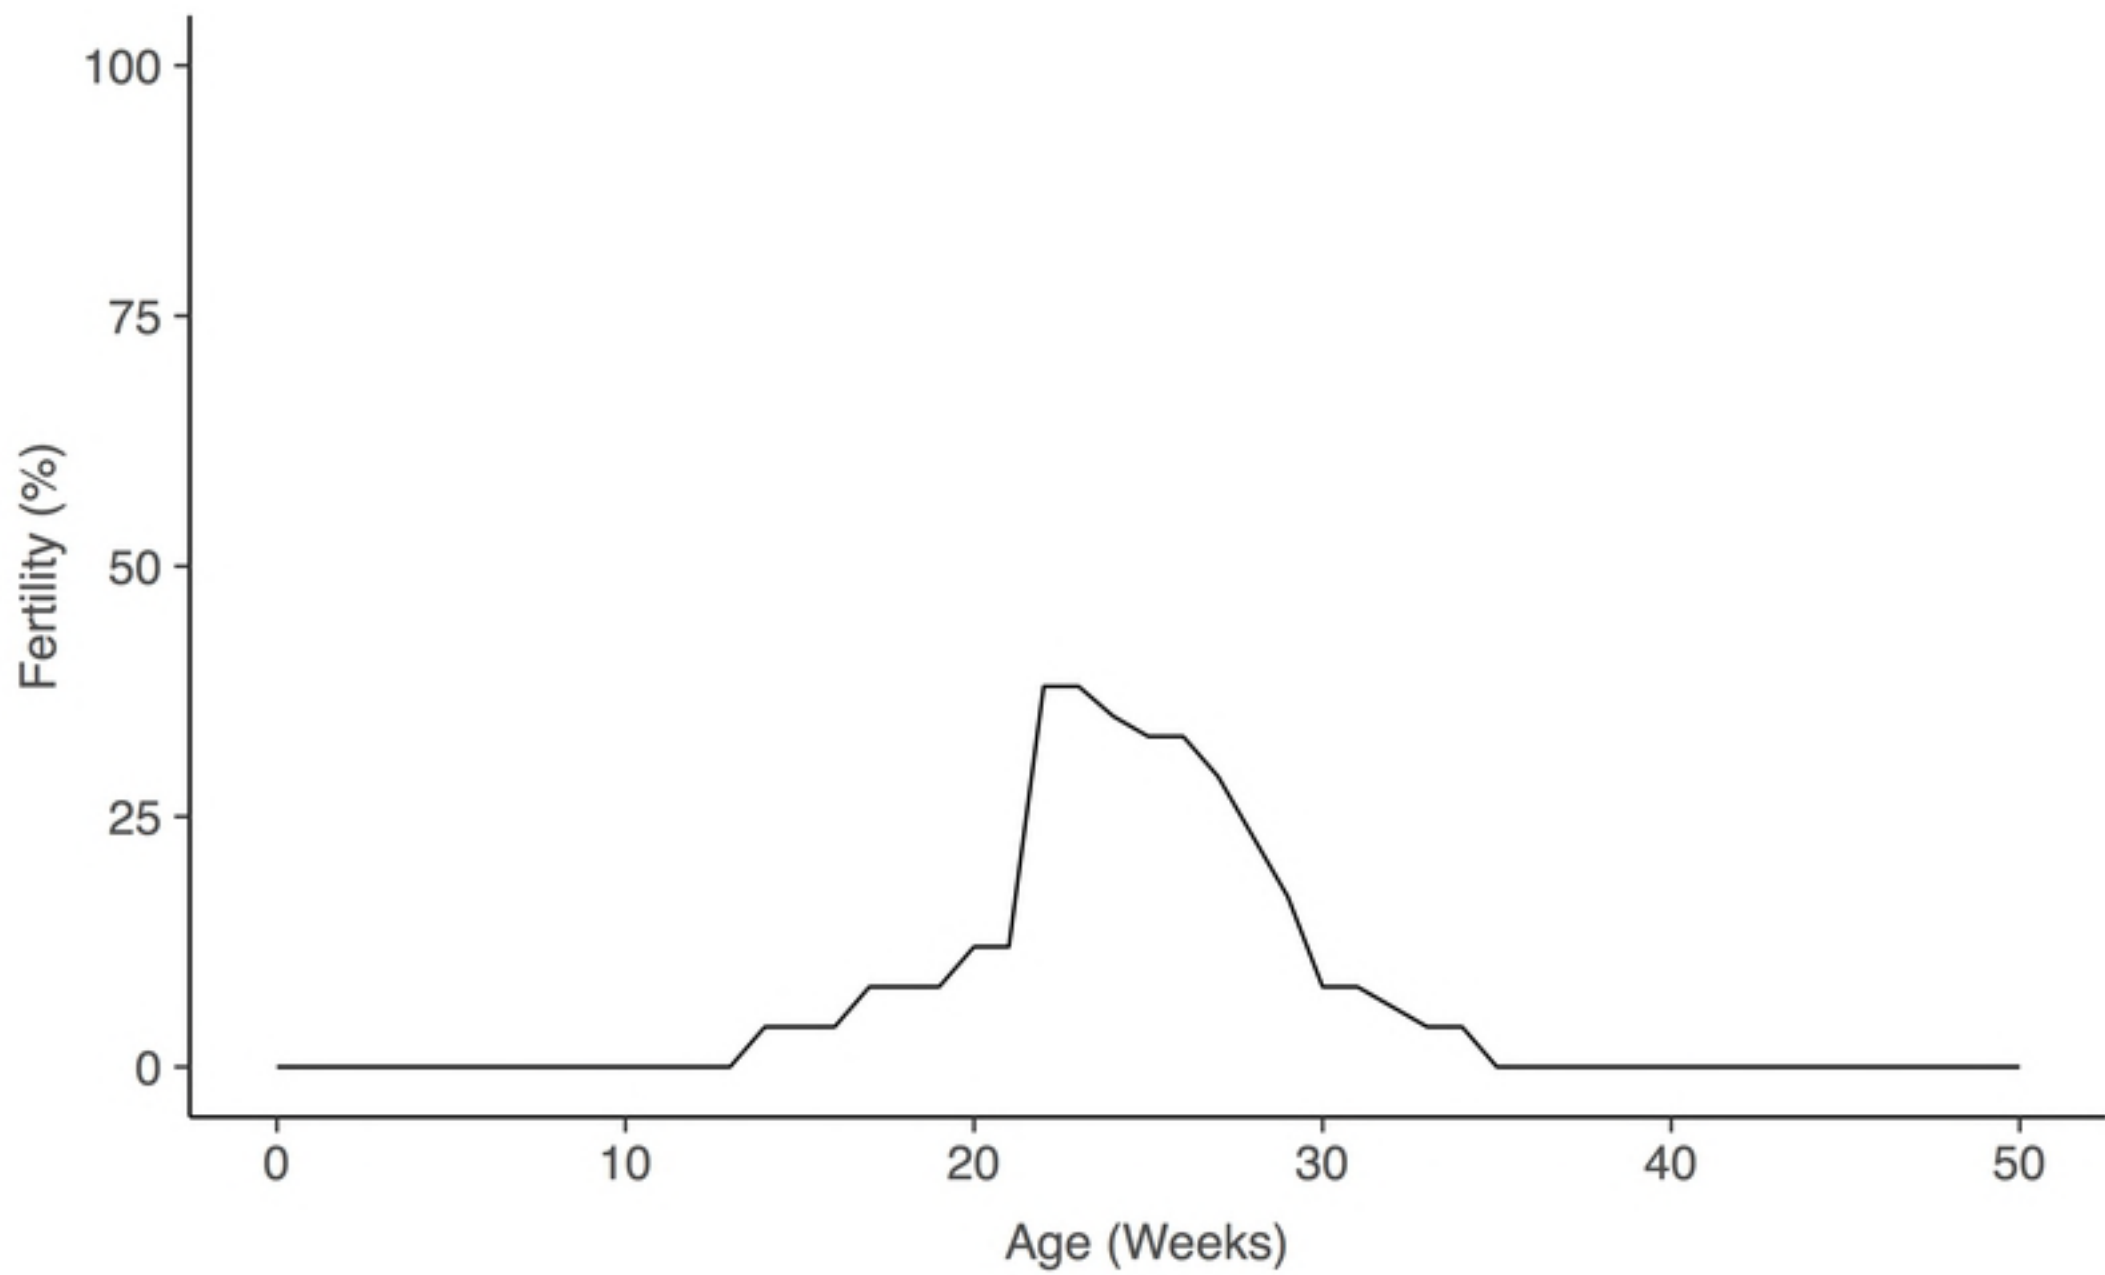

8 Week

20 Week

35 Week

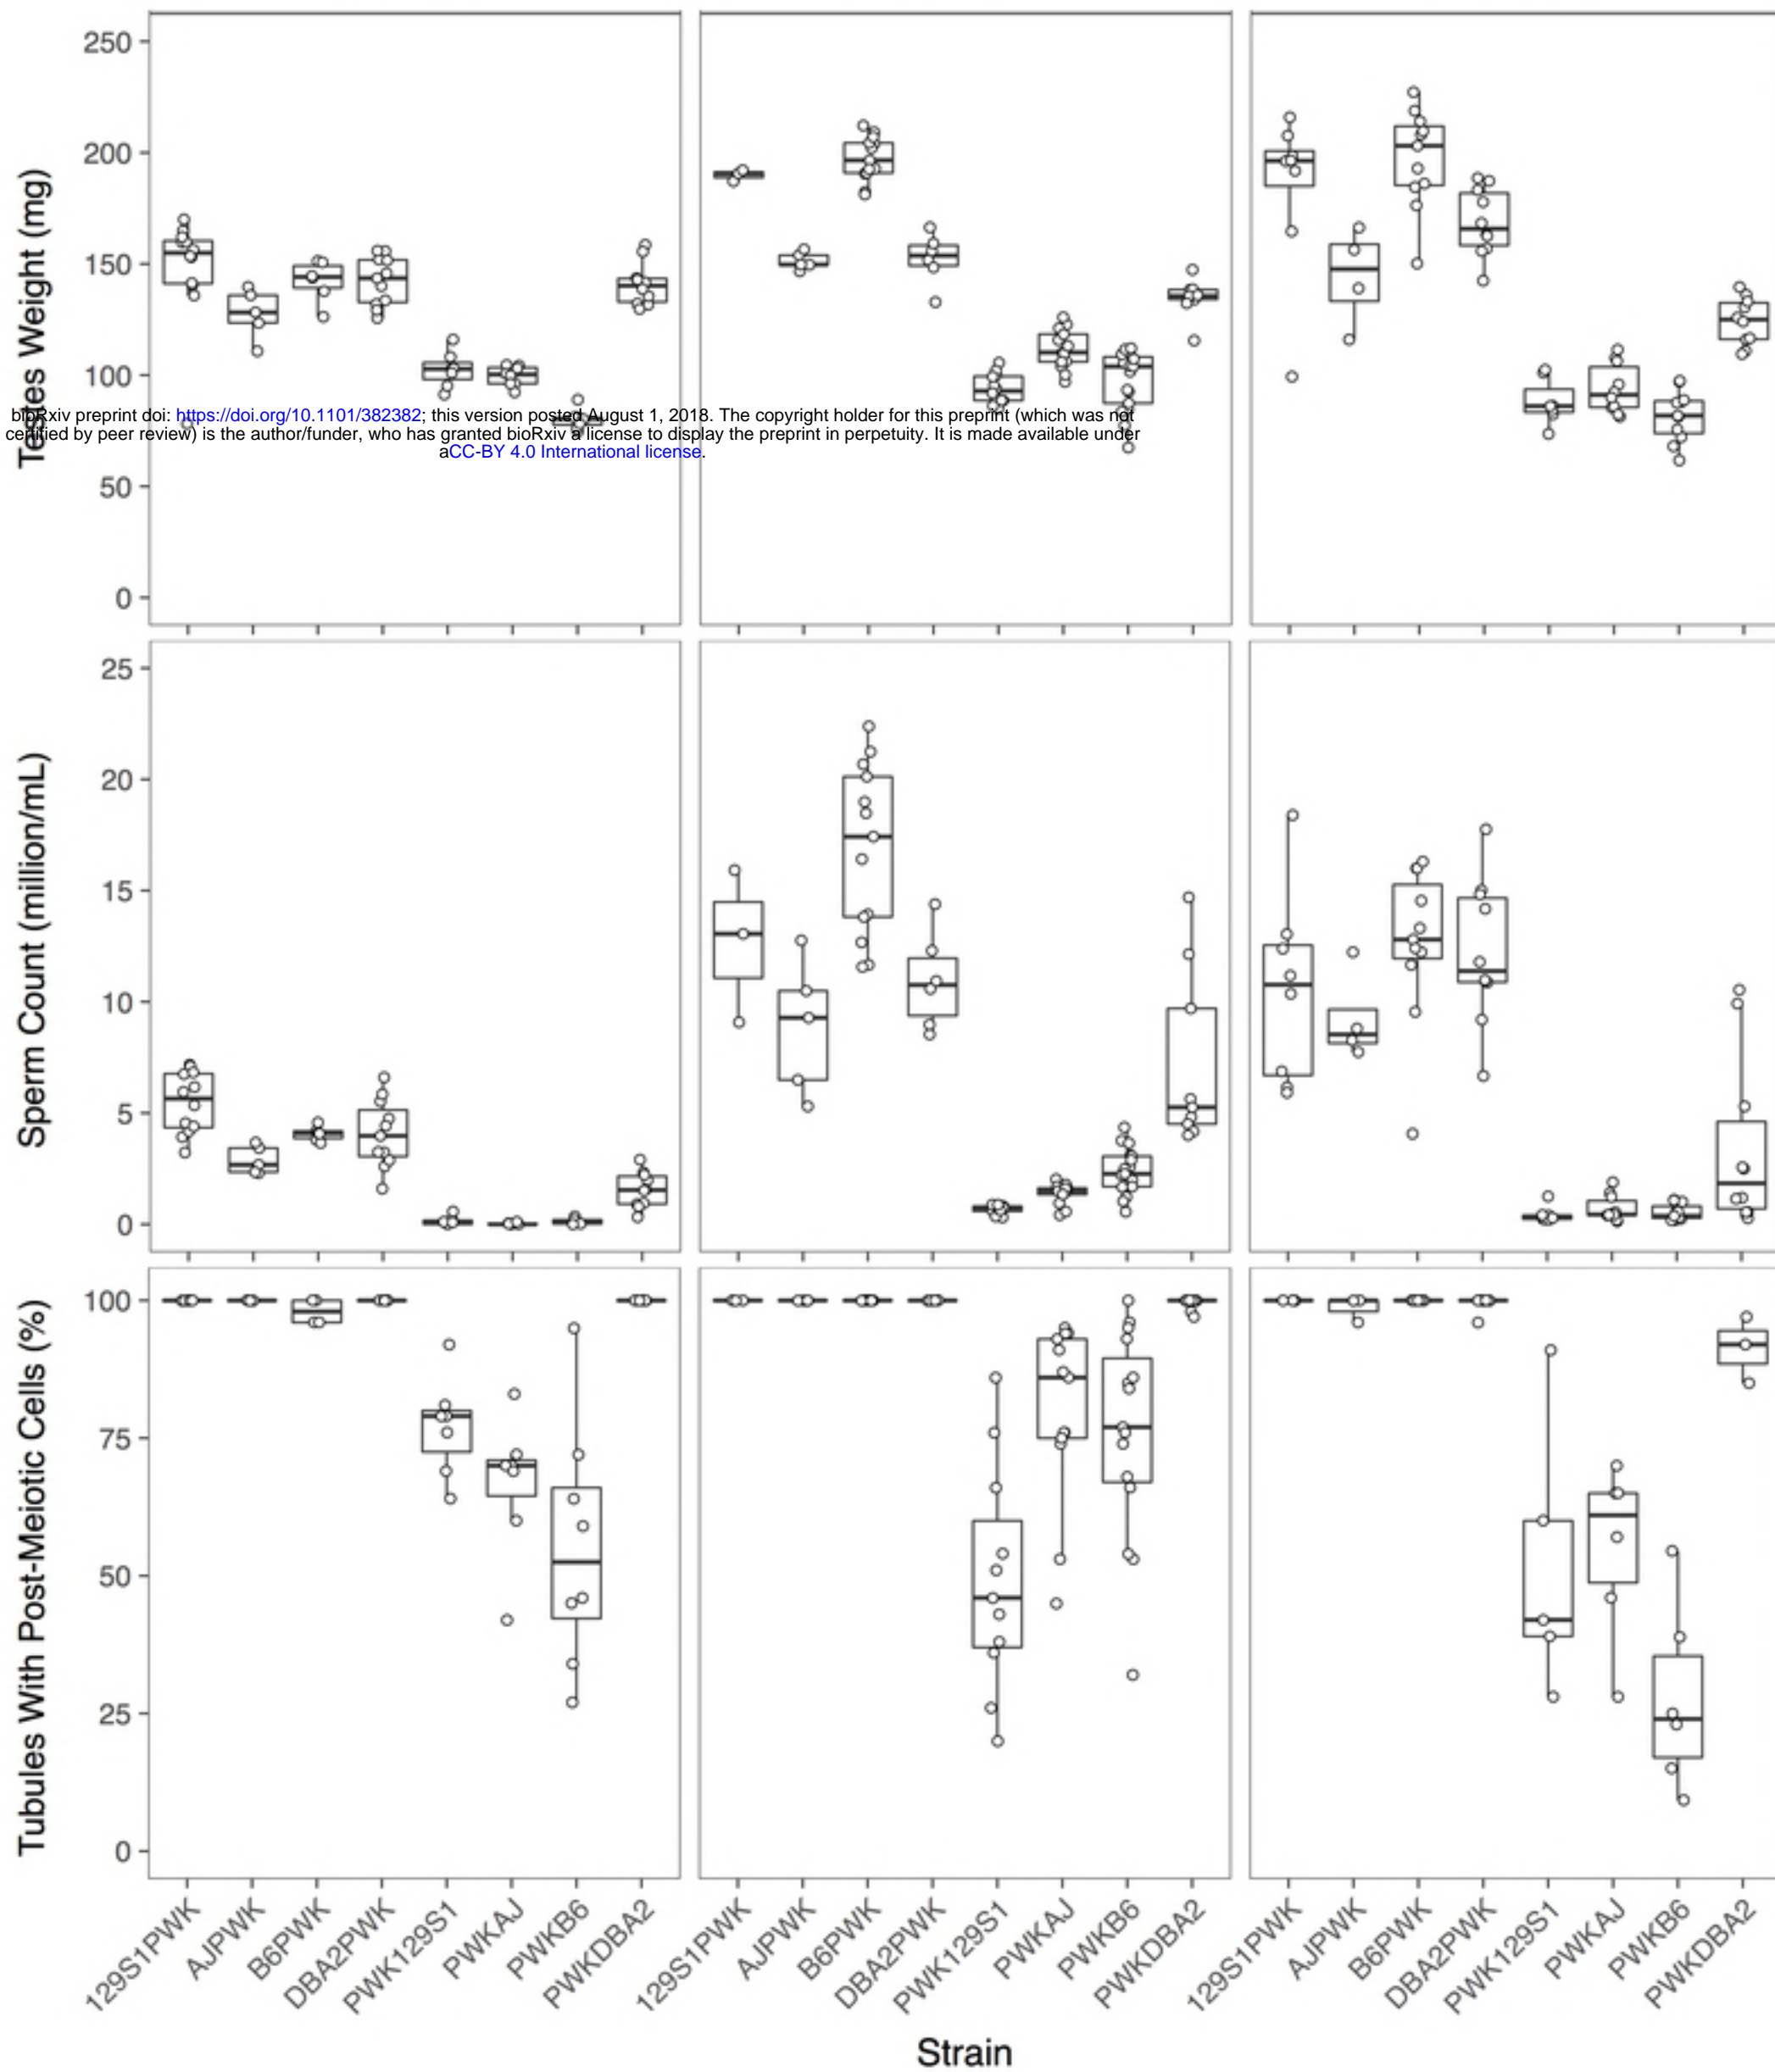

**A**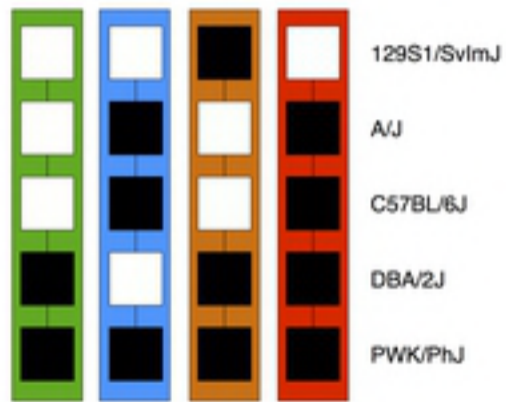**B**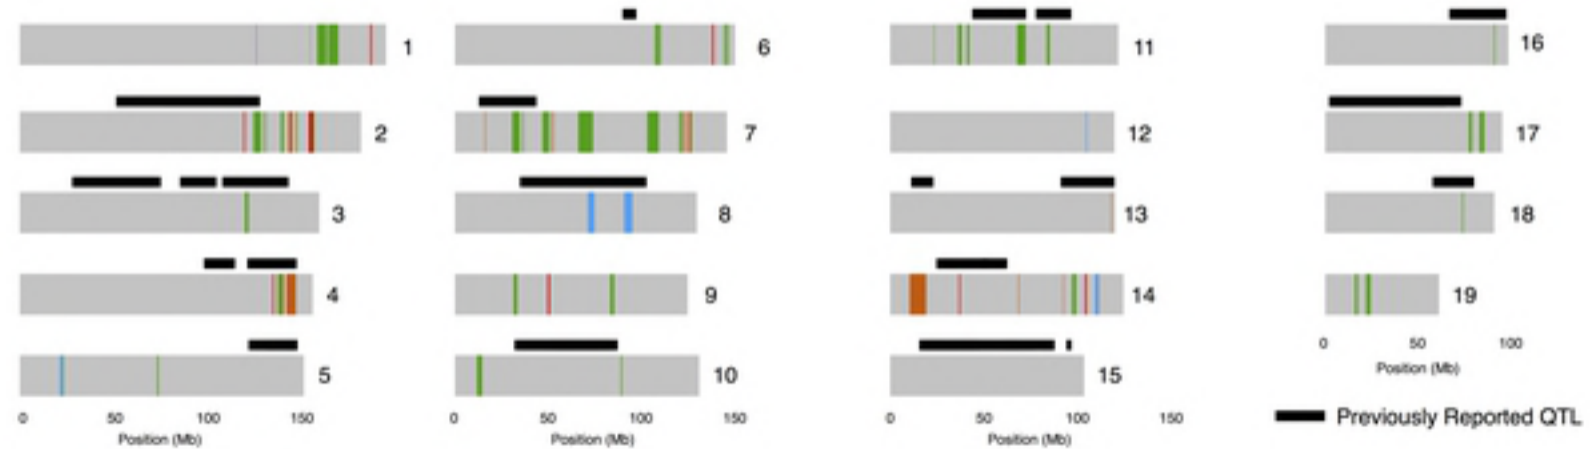

Source: https://www.biorxiv.org/content/10.1101/382382v1.full.pdf
